# Supplementary material for: Extra high superoxide dismutase in host tissue is associated with improving bleaching resistance in “thermal adapted” and Durusdinium trenchii -associating coral
Source: PeerJ journal article supplement (doi:10.7717/peerj.12746), 2022-01-12
Supplement: b-actin_sequence.pdf [file b-actin_sequence.pdf]

Platygyra-b-actin

TTCCTTGGAATGGAATCTGCAGGTATCCACGAGACCACATATAATTCCATCATGAAGTGCGACG  
TGGACATCCGAAAGGACTTGTACGCCAACACAGTGTTGTCTGGTGGCTCCACGTACCCAGGA  
ATCGCTGACAGAATGCAGAAAGAAATCACTTCGC

Isopora- b-actin

TTCCTTGGAATGGAATCTGCTGGAATCCACGAGACCACGTATAACTCCATCATGAAGTGCGAT  
GTGGATATCCGTAAGGACCTGTACGCCAACACAGTATTATCCGGTGGCTCTACCATGTATCCTG  
GAATTGCTGACAGAATGCAGAAAGAAATCACTTCGC
