# Supplementary material for: Extra high superoxide dismutase in host tissue is associated with improving bleaching resistance in “thermal adapted” and Durusdinium trenchii -associating coral
Source: PeerJ journal article supplement (doi:10.7717/peerj.12746), 2022-01-12

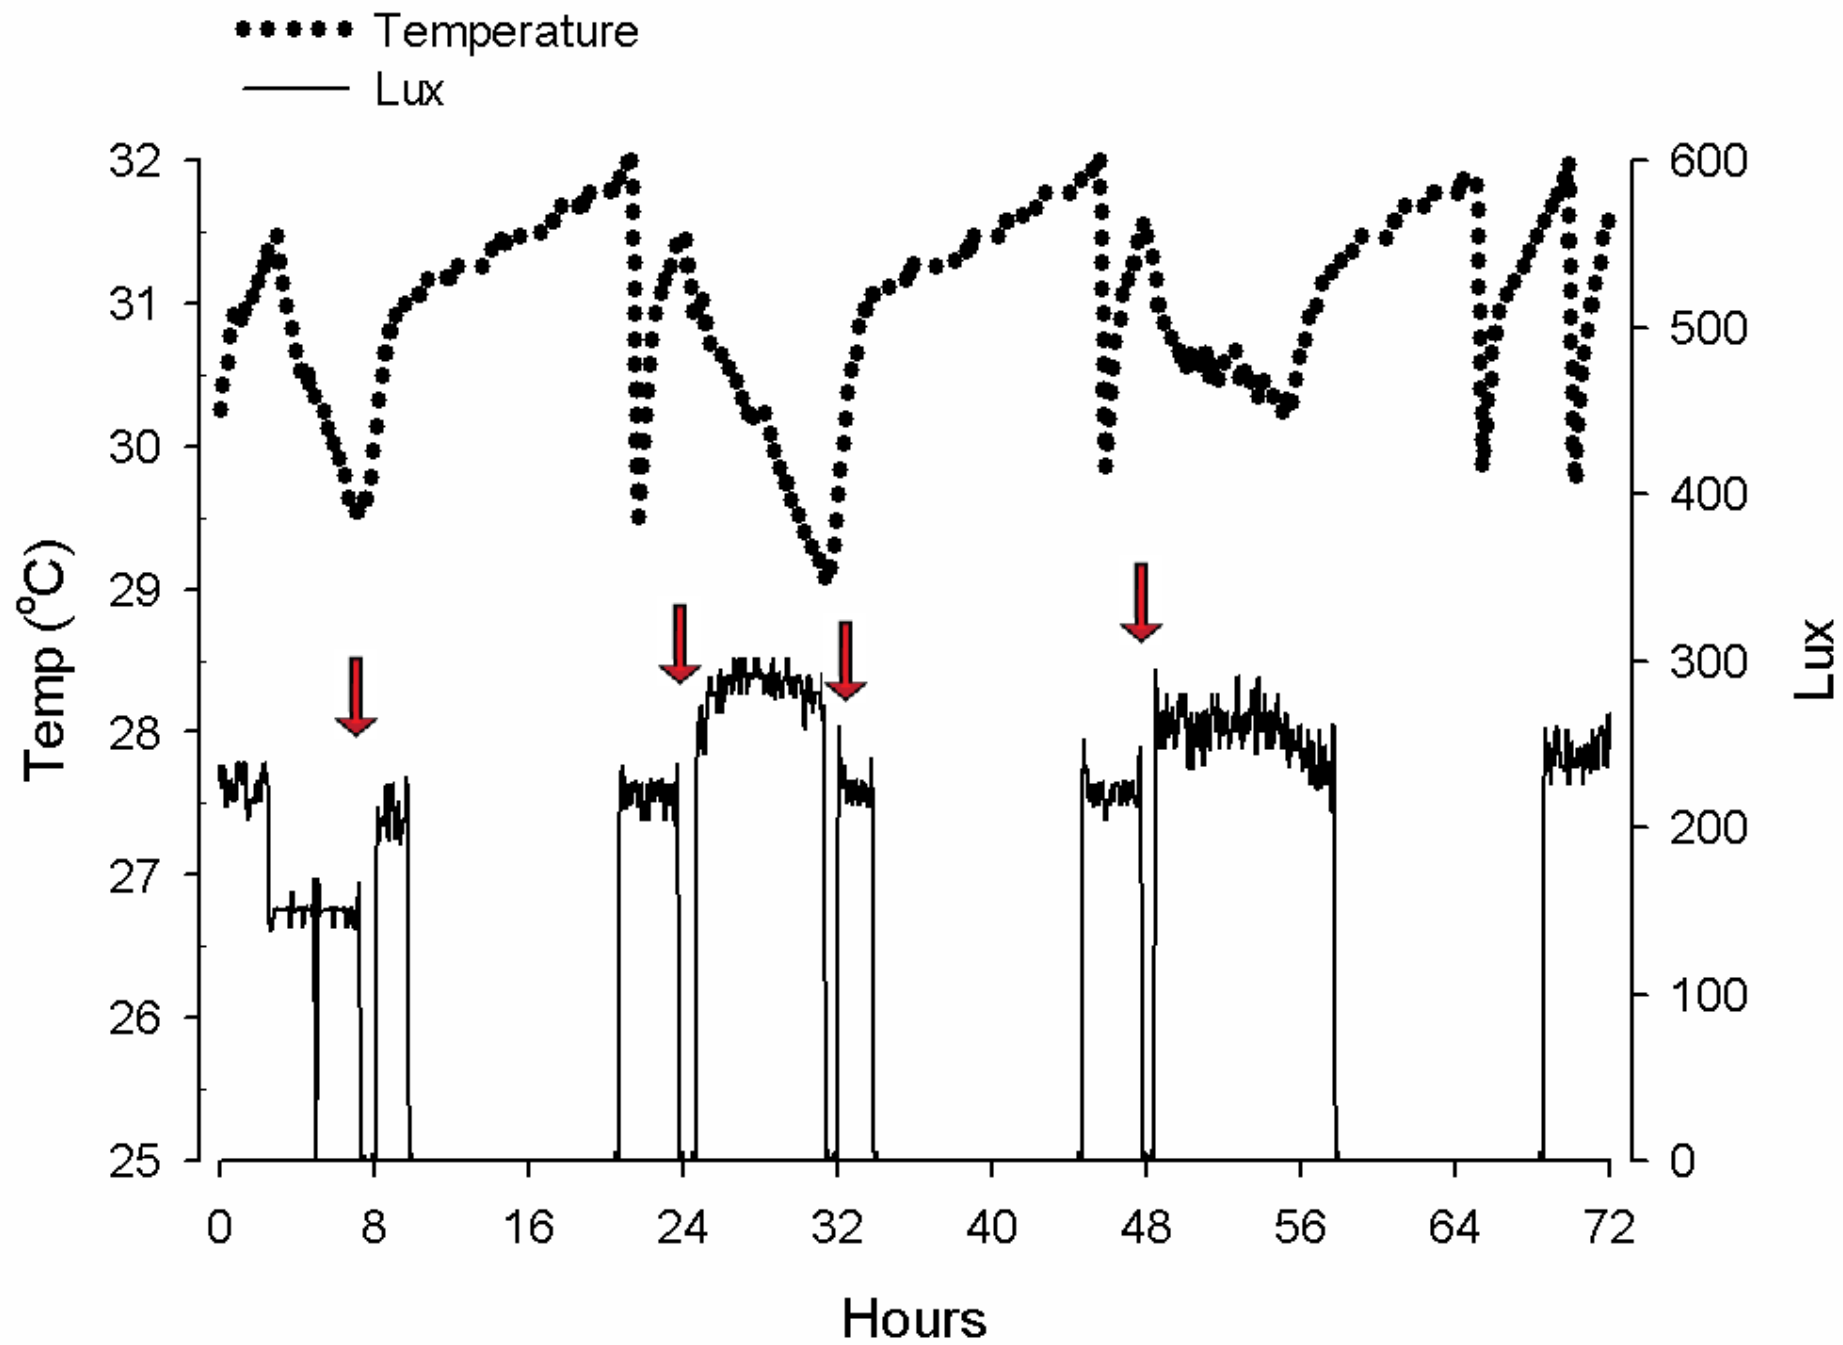

Supplement: fig._s1_new.pdf [file fig._s1_new.pdf]
