# Supplementary material for: Extra high superoxide dismutase in host tissue is associated with improving bleaching resistance in “thermal adapted” and Durusdinium trenchii -associating coral
Source: PeerJ journal article supplement (doi:10.7717/peerj.12746), 2022-01-12
Supplement: fig._s3.pdf [file fig._s3.pdf]

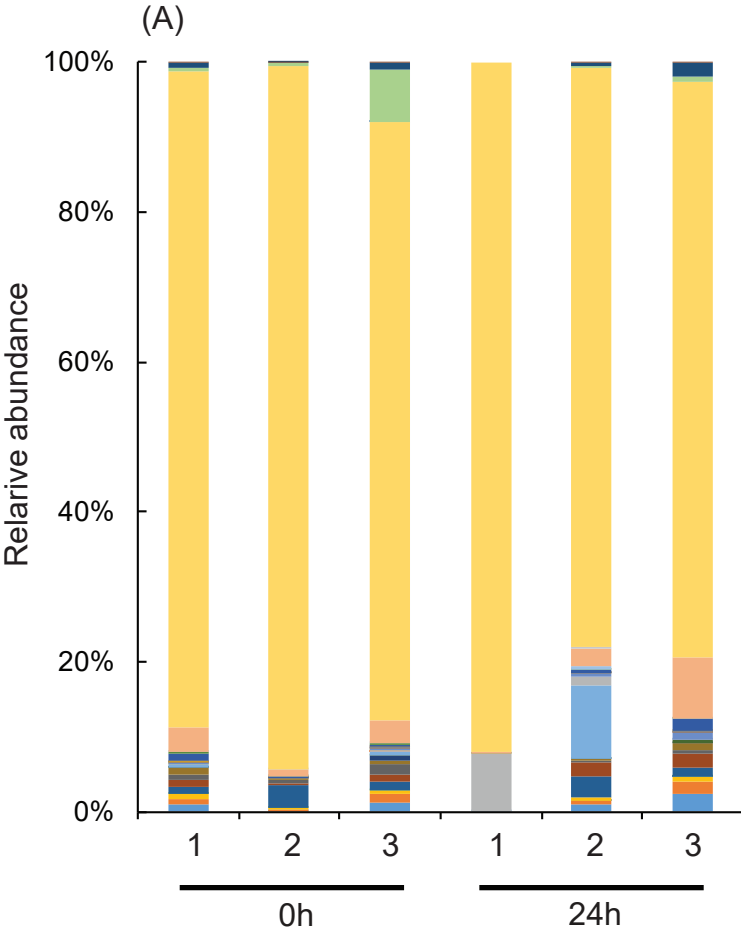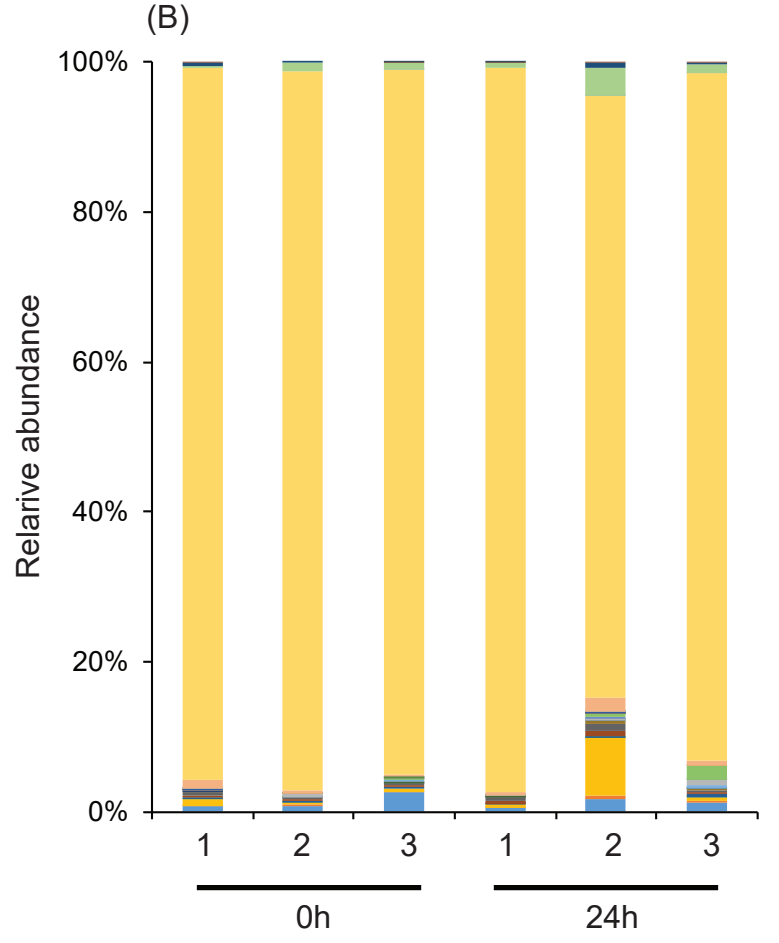

- |                      |                    |                       |                      |
|----------------------|--------------------|-----------------------|----------------------|
| ■ Acidobacteria      | ■ Actinobacteria   | ■ AncK6               | ■ Bacteroidetes      |
| ■ BRC1               | ■ Calditrichaeota  | ■ Chlamydiae          | ■ Chloroflexi        |
| ■ Cyanobacteria      | ■ Dadabacteria     | ■ Deinococcus-Thermus | ■ Entotheonellaeota  |
| ■ Epsilonbacteraeota | ■ FCPU426          | ■ Firmicutes          | ■ Fusobacteria       |
| ■ Gemmatimonadetes   | ■ Halanaerobiaeota | ■ Hydrogenedentes     | ■ Kiritimatiellaeota |
| ■ Latescibacteria    | ■ Lentisphaerae    | ■ Nitrospirae         | ■ Patescibacteria    |
| ■ PAUC34f            | ■ Planctomycetes   | ■ Poribacteria        | ■ Proteobacteria     |
| ■ Spirochaetes       | ■ unclassified     | ■ Verrucomicrobia     | ■ WPS-2              |
