# Supplementary material for: Extra high superoxide dismutase in host tissue is associated with improving bleaching resistance in “thermal adapted” and Durusdinium trenchii -associating coral
Source: PeerJ journal article supplement (doi:10.7717/peerj.12746), 2022-01-12

(A) *P. verweyi* with antibiotics treatment

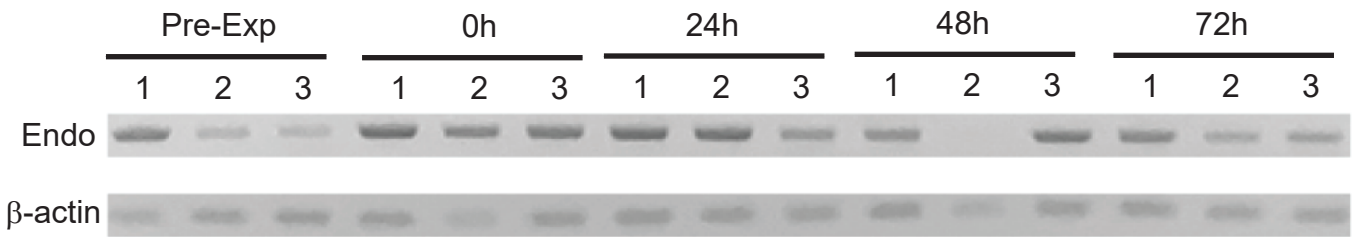

(B) *P. verweyi* recovery from antibiotics treatment

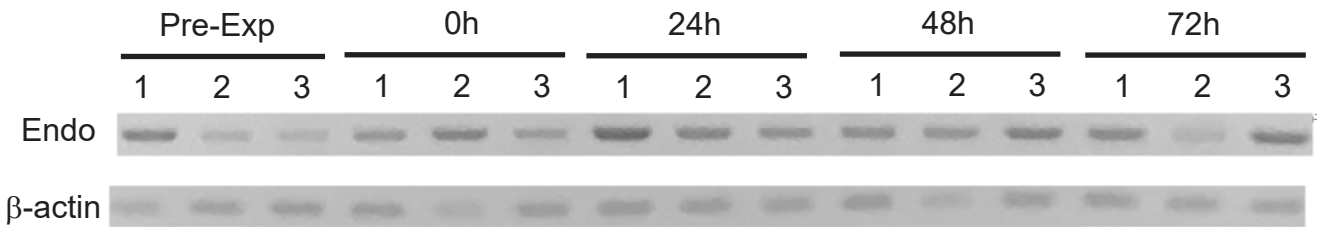

(C) *I. palifera* with Endozoicomonas inoculation

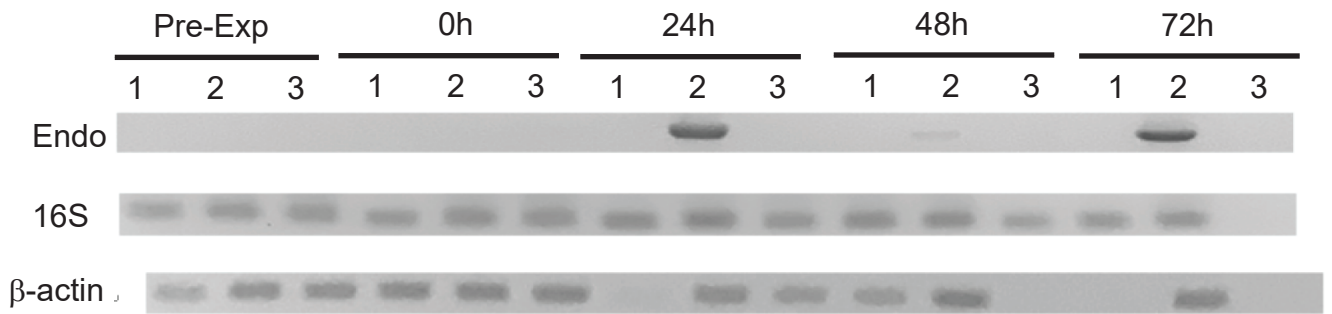

(D) *I. palifera* without Endozoicomonas inoculation

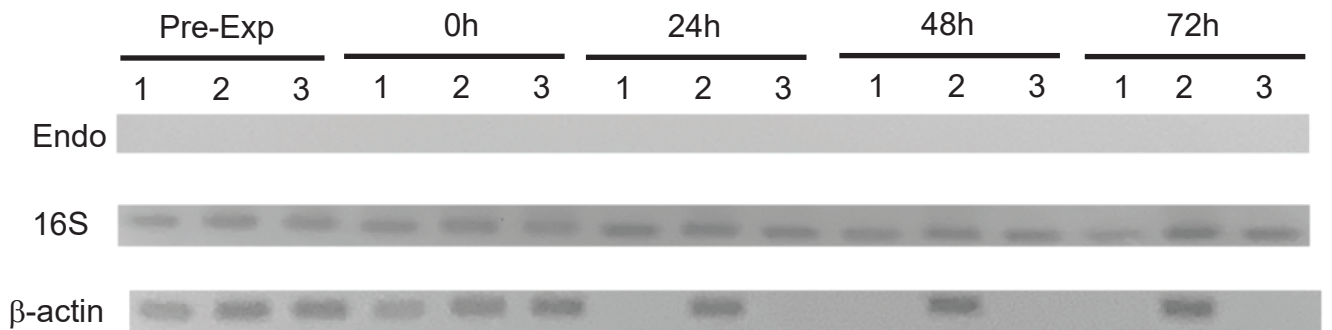

Supplement: fig._s5.pdf [file fig._s5.pdf]
