# Supplementary material for: Extra high superoxide dismutase in host tissue is associated with improving bleaching resistance in “thermal adapted” and Durusdinium trenchii-associating coral
Source: PeerJ. 2022 Jan 12;10:e12746. doi: 10.7717/peerj.12746 (PMC8760857; doi:10.7717/peerj.12746)
Supplement: Supplemental Information 9 [file peerj-10-12746-s009.xlsx]

## Sheet: Table 1
Platygyra							Isopora
colony replicates: A, B, C							colony replicates: A, B, C
-E: Antibiotics treated, R: recovery from antibiotics treated							+E: Endozoicomonas added, -E: no Endozoicomonas added
	time	replication /treatment	algal density (*10^6/cm^2)	mean	SD			time	replication /treatment	algal density (*10^6/cm^2)	mean	SD
before treatment	0	A	2.9135	2.61113	0.800122		before treatment	0	A	1.13203	2.33492	1.24039
		B	1.70388						B	3.60968
		C	3.216						C	2.26304
heating hour	0hr	-E(A)	3.28869				heating hour	0hr	+E(A)	1.31776
		-E(B)	3.30933						+E(B)	2.47001
		-E(C)	3.60789						+E(C)	1.71728
		R(A)	5.186						-E(A)	1.56399
		R(B)	2.41064						-E(B)	2.29
		R(C)	2.33689						-E(C)	1.52134
	24hr	-E(A)	3.82568					24hr	+E(A)	0.383366
		-E(B)	2.14232						+E(B)	1.27242
		-E(C)	3.11926						+E(C)	0.200004
		R(A)	4.9302						-E(A)	0.462155
		R(B)	2.23512						-E(B)	1.5136
		R(C)	3.82171						-E(C)	0.3894
	48hr	-E(A)	3.60779					48hr	+E(A)	0.218462
		-E(B)	1.79304						+E(B)	1.2884
		-E(C)	4.05191						+E(C)	0.0539436
		R(A)	5.16399						-E(A)	0.349091
		R(B)	1.30712						-E(B)	1.65752
		R(C)	2.55686						-E(C)	0.321391
	72hr	-E(A)	3.89608					72hr	+E(A)	0.0926694
		-E(B)	4.01659						+E(B)	0.0408
		-E(C)	3.10542						+E(C)	0.0683707
		R(A)	3.44025						-E(A)	0.0802376
		R(B)	2.742						-E(B)	1.64174
		R(C)	3.32829						-E(C)	0.244413
	25℃ control	-E(A)	2.91545					25℃ control	+E(A)	1.15646
		-E(B)	1.9821						+E(B)	1.84666
		-E(C)	4.14257						+E(C)	1.93144
		R(A)	3.7917						-E(A)	0.900607
		R(B)	1.68085						-E(B)	2.10698
		R(C)	4.53739						-E(C)	1.55206
