# Supplementary material for: Extra high superoxide dismutase in host tissue is associated with improving bleaching resistance in “thermal adapted” and Durusdinium trenchii-associating coral
Source: PeerJ. 2022 Jan 12;10:e12746. doi: 10.7717/peerj.12746 (PMC8760857; doi:10.7717/peerj.12746)
Supplement: Supplemental Information 10 [file peerj-10-12746-s010.xlsx]

## Sheet: Platygyra SOD
3 colonies: A, B, C
	replication /treatment	U/mg	mean	sd
before treatement	0A	60.6067	83.8269	27.8007
	0B	114.633
	0C	76.2408
-E: antibiotics (AB) treated	-EA0	43.9564
	-EB0	98.418
	-EC0	77.9979
	-EA24	61.7767
	-EB24	83.3361
	-EC24	73.2137
	-EA48	57.3082
	-EB48	117.246
	-EC48	48.0979
	-EA72	61.8718
	-EB72	74.4861
	-EC72	59.8204
25°C control	-EA25C	63.3562
	-EB25C	141.229
	-EC25C	85.0037
R: recovery from AB treatment	RA0	48.6914
	RB0	114.01
	RC0	74.7808
	RA24	63.5558
	RB24	125.719
	RC24	47.7141
	RA48	40.846
	RB48	101.072
	RC48	47.3002
	RA72	63.6308
	RB72	60.1416
	RC72	40.2508
25°C control	RA25C	55.9679
	RB25C	80.6667
	RC25C	62.2823

## Sheet: Isopora SOD
3 colonies: A, B, C
	replication /treatment	U/mg	mean	SD
before treatement	0A	12.9254	11.6469	2.1087
	0B	12.8023
	0C	9.21303
+E: Endozoicomonas added	+EA0	14.8117
	+EB0	18.1136
	+EC0	9.93632
	+EA24	15.0493
	+EB24	14.1078
	+EC24	11.5459
	+EA48	9.16528
	+EB48	13.0425
	+EC48	12.2655
	+EA72	27.976
	+EB72	46.9235
	+EC72	11.4424
25°C control	+EA25C	13.6033
	+EB25C	18.0035
	+EC25C	9.62944
-E: no Endozoicomonas added	-EA0	10.1989
	-EB0	8.16079
	-EC0	12.6223
	-EA24	7.77863
	-EB24	11.148
	-EC24	7.69471
	-EA48	9.73183
	-EB48	8.73785
	-EC48	9.85536
	-EA72	7.95084
	-EB72	9.05308
	-EC72	8.12604
25°C control	-EA25C	9.63571
	-EB25C	5.93554
	-EC25C	9.3853

## Sheet: Platygyra CAT
3 colonies: A, B, C
	replication /treatment	mmol/min/mg	mean	SD
before treatement	0A	929.521	1493.08	616.698
	0B	2151.84
	0C	1397.86
-E: antibiotics (AB) treated	-EA0	803.057
	-EB0	1959.53
	-EC0	1469.35
	-EA24	1265.86
	-EB24	1801.86
	-EC24	2138.77
	-EA48	1232.91
	-EB48	3892.85
	-EC48	1302.64
	-EA72	1894.6
	-EB72	2642.82
	-EC72	3166.17
25°C control	-EA25C	1460.28
	-EB25C	3500.27
	-EC25C	2435.93
R: recovery from AB treatment	RA0	1199.66
	RB0	2169.12
	RC0	1502.37
	RA24	1353.98
	RB24	2139
	RC24	1401.9
	RA48	978.479
	RB48	2560.86
	RC48	1599.04
	RA72	1249.31
	RB72	1766.56
	RC72	1041.41
25°C control	RA25C	1318.06
	RB25C	1435.61
	RC25C	1692.42

## Sheet: Isopora CAT
3 colonies: A, B, C
	replication /treatment	mmol/min/mg	mean	SD
before treatement	0A	1542.22	1230.27	309.018
	0B	924.269
	0C	1224.33
+E: Endozoicomonas added	+EA0	2273.53
	+EB0	2380.06
	+EC0	1730.52
	+EA24	3542.84
	+EB24	2286.73
	+EC24	2719.36
	+EA48	3077.72
	+EB48	2479.16
	+EC48	2599.74
	+EA72	930.99
	+EB72	894.726
	+EC72	2973.54
25°C control	+EA25C	2578.77
	+EB25C	2054.51
	+EC25C	2132.9
-E: no Endozoicomonas added	-EA0	1457.38
	-EB0	1489.38
	-EC0	2075.59
	-EA24	2014.19
	-EB24	1870.55
	-EC24	2546.66
	-EA48	2449.16
	-EB48	2369.71
	-EC48	2487.66
	-EA72	2511.06
	-EB72	2202.93
	-EC72	2304.28
25°C control	-EA25C	1975.73
	-EB25C	1680.72
	-EC25C	2215.28
