# Supplementary material for: Extra high superoxide dismutase in host tissue is associated with improving bleaching resistance in “thermal adapted” and Durusdinium trenchii-associating coral
Source: PeerJ. 2022 Jan 12;10:e12746. doi: 10.7717/peerj.12746 (PMC8760857; doi:10.7717/peerj.12746)
Supplement: Supplemental Information 11 [file peerj-10-12746-s011.xlsx]

## Sheet: phylum level
treatment	Isopora (before heating)			Isopora (24 h at 31oC)			Platygyra (before heating)			Platygyra (24 h at 31oC)
label/replications	I0H1	I0H2	I0H3	I24H1	I24H2	I24H3	P0H1	P0H2	P0H3	P24H1	P24H2	P24H3
	relative abundance (%)
Acidobacteria	0.862304	0.0627487	0.637616	0	0.435492	2.03614	0.422644	0.0283447	1.90962	0.379914	1.51943	0.648323
Actinobacteria	0.778056	0.0556181	1.18155	0	0.359126	1.54619	0.107149	0.0680272	0.035583	0.13765	0.339519	0.193986
Bacteria_unclassified	4.79223	3.32853	11.7249	0.172513	5.45087	8.69178	2.00607	3.19728	2.7557	2.16386	7.68455	5.44693
Bacteroidetes	0.455931	0.138332	0.250816	0	0.352934	0.267244	0.881005	0.289116	0.340015	0.231252	0.837031	0.382868
Balneolaeota	0.0396462	0.00142611	0	0	0	0	0.00595274	0	0.00395366	0	0.0201694	0
Campilobacterota	0.393984	0.0513398	0.341472	0.0575043	9.59526	0.0509035	0.0119055	0.0170068	0.249081	0	0.0134463	0.423707
Candidatus_Saccharibacteria	0.0569914	0.122645	0.0846126	0	0.109389	0.0572665	0.00595274	0.00566893	0.0158147	0.011012	0.0403388	0.0153147
Chlamydiae	0.624427	2.80515	1.12112	0	2.73059	1.11351	0.0357164	0.141723	0.229312	0.05506	0.23531	0.28077
Chlorobi	0.00247788	0.00285221	0	0	0.00206394	0	0.0119055	0.0566893	0	0	6.52817	0.00510491
Chloroflexi	0.973809	0.195377	0.873323	0	0.856535	1.52711	0.303589	0.294785	0.209544	0.374408	0.57819	0.336924
Cyanobacteria/Chloroplast	0.646728	0.519103	1.15436	0	0.253865	0.388139	0.404786	0.113379	0.193729	0.423962	0.951324	0.132728
Deferribacteres	0.0297346	0.00285221	0.0120875	0	0	0.0318147	0.0178582	0.0170068	0	0.02753	0.0369773	0.0153147
Deinococcus-Thermus	0	0	0.646682	0	0	0	0	0	0	0	0	0
Firmicutes	0.126372	0.0199655	0.335429	7.59057	1.15374	0.0699924	0.0119055	0.31746	0.173961	0	0.275649	0.719792
Fusobacteria	0.00247788	0	0.00604376	0	0	0	0	0	0	0	0	0
Hydrogenedentes	0.00495577	0	0.00604376	0	0.00825576	0.0127259	0	0	0	0	0.00672314	0
Nitrospirae	0.904428	0.0156872	0.24175	0	0.27244	1.50165	0.0952438	0	0.0158147	0.05506	0.0571467	0
Planctomycetes	1.68744	0.332283	1.55325	0.230017	1.32092	4.7213	0.666706	0.249433	0.249081	0.258782	1.07906	0.316504
Poribacteria	0	0.00142611	0	0	0.142412	0	0	0	0	0	0	0
Proteobacteria	86.721	92.1849	78.8045	91.9494	76.5371	75.8272	94.4223	95.119	93.5279	95.6558	78.9095	90.5151
Rhodothermaeota	0.178408	0.0470615	0.0634594	0	0.0598543	0.369051	0.0595274	0.0283447	0.0316293	0.05506	0.174802	0.142937
Spirochaetes	0	0	0.00302188	0	0	0	0	0	0.0158147	0	0.0168079	0.0306294
Verrucomicrobia	0.718587	0.112662	0.957935	0	0.359126	1.78799	0.529793	0.0566893	0.0434903	0.170686	0.695845	0.393078
sum	100	100	100	100	100	100	100	100	100	100	100	100

## Sheet: class level
treatment	Isopora (before heating)			Isopora (24 h at 31oC)			Platygyra (before heating)			Platygyra (24 h at 31oC)
label/replications	I0H1	I0H2	I0H3	I24H1	I24H2	I24H3	P0H1	P0H2	P0H3	P24H1	P24H2	P24H3
	relative abundance (%)
Acidobacteria_Gp10	0.329559	0.0256699	0.220597	0	0.0908134	1.07534	0.345259	0.00566893	0.011861	0.08259	0.184886	0.0153147
Acidobacteria_Gp11	0	0	0	0	0.123836	0	0	0	0	0	0	0
Acidobacteria_Gp21	0.086726	0.00570443	0	0	0.0515985	0.0127259	0	0	0	0	0	0
Acidobacteria_Gp22	0.0941596	0.00713053	0.099722	0	0.0908134	0.235429	0.00595274	0.0170068	0.00395366	0.011012	0.0739546	0.0204196
Acidobacteria_Gp26	0.0173452	0.00570443	0.00906564	0	0.0185755	0.152711	0	0	0.00395366	0	0.0134463	0
Acidobacteria_Gp3	0.00247788	0	0.0211531	0	0	0	0	0	0	0	0	0
Acidobacteria_unclassified	0.0743365	0.00427832	0.0846126	0	0.0309591	0.279969	0.0654801	0	0.011861	0.242264	0.0403388	0
Blastocatellia	0.116461	0.00142611	0.196422	0	0	0.0827182	0.00595274	0.00566893	1.87799	0.016518	1.20008	0.612589
Holophagae	0.106549	0.00998274	0	0	0.00619182	0	0	0	0	0.02753	0	0
Vicinamibacteria	0.0346904	0.00285221	0.00604376	0	0.0227033	0.197251	0	0	0	0	0.00672314	0
Acidimicrobiia	0.607082	0.0370788	0.592288	0	0.241481	1.31077	0.101196	0.0566893	0.0276756	0.126638	0.289095	0.0612589
Actinobacteria	0.116461	0.0114089	0.486522	0	0.0866855	0.0509035	0.00595274	0.0113379	0.00790733	0.005506	0.0201694	0.127623
Actinobacteria_unclassified	0.0545135	0.00713053	0.0967001	0	0.0309591	0.159074	0	0	0	0.005506	0.0302541	0.00510491
Thermoleophilia	0	0	0.00604376	0	0	0.0254518	0	0	0	0	0	0
Bacteria_unclassified	4.79223	3.32853	11.7249	0.172513	5.45087	8.69178	2.00607	3.19728	2.7557	2.16386	7.68455	5.44693
Bacteroidetes_unclassified	0.0322125	0.0185394	0.00604376	0	0.0268312	0.0190888	0.00595274	0.0170068	0.0434903	0.011012	0.0268926	0.0357343
Bacteroidia	0	0	0	0	0	0	0	0	0.00395366	0	0.00336157	0.00510491
Cytophagia	0.106549	0.0641748	0.123897	0	0.175435	0.197251	0.142866	0.136054	0.110703	0.104614	0.36305	0.224616
Flavobacteriia	0.280001	0.0427832	0.102744	0	0.14654	0.0318147	0.660754	0.0793651	0.158147	0.115626	0.376496	0.0918883
Saprospiria	0.0371683	0.012835	0.0181313	0	0.00412788	0.0190888	0.0714328	0.0566893	0.023722	0	0.0672314	0.0255245
Balneolia	0.0396462	0.00142611	0	0	0	0	0.00595274	0	0.00395366	0	0.0201694	0
Campylobacteria	0.393984	0.0513398	0.341472	0.0575043	9.59526	0.0509035	0.0119055	0.0170068	0.249081	0	0.0134463	0.423707
Candidatus_Saccharibacteria_unclassified	0.0569914	0.122645	0.0846126	0	0.109389	0.0572665	0.00595274	0.00566893	0.0158147	0.011012	0.0403388	0.0153147
Chlamydiia	0.624427	2.80515	1.12112	0	2.73059	1.11351	0.0357164	0.141723	0.229312	0.05506	0.23531	0.28077
Chlorobia	0.00247788	0.00285221	0	0	0.00206394	0	0.0119055	0.0566893	0	0	6.52817	0.00510491
Anaerolineae	0.309736	0.0556181	0.148072	0	0.163051	0.470858	0.089291	0.113379	0.0434903	0.132144	0.245395	0.142937
Caldilineae	0.0693808	0	0.114831	0	0.27244	0.178162	0.0119055	0.00566893	0	0.011012	0.0134463	0
Chloroflexi_unclassified	0.587259	0.139758	0.607398	0	0.421044	0.789005	0.19644	0.175737	0.166054	0.231252	0.315988	0.193986
Chloroflexia	0.00743365	0	0	0	0	0	0	0	0	0	0	0
Thermomicrobia	0	0	0.00302188	0	0	0.0890812	0.00595274	0	0	0	0.00336157	0
Cyanobacteria	0.646728	0.519103	1.15436	0	0.253865	0.388139	0.404786	0.113379	0.193729	0.423962	0.951324	0.132728
Deferribacteres	0.0297346	0.00285221	0.0120875	0	0	0.0318147	0.0178582	0.0170068	0	0.02753	0.0369773	0.0153147
Deinococci	0	0	0.646682	0	0	0	0	0	0	0	0	0
Bacilli	0.0272567	0.0114089	0.117853	0	0.00412788	0	0	0.00566893	0.00790733	0	0.0302541	0.0153147
Clostridia	0.0991154	0.00855664	0.217575	7.59057	1.14962	0.0699924	0.0119055	0.300454	0.158147	0	0.188248	0.597274
Firmicutes_unclassified	0	0	0	0	0	0	0	0.0113379	0.00790733	0	0.0571467	0.107203
Fusobacteriia	0.00247788	0	0.00604376	0	0	0	0	0	0	0	0	0
Candidatus_Hydrogenedens	0.00495577	0	0.00604376	0	0.00825576	0.0127259	0	0	0	0	0.00672314	0
Nitrospinia	0.193275	0.00142611	0.024175	0	0.0103197	0.101807	0.00595274	0	0	0.005506	0	0
Nitrospira	0.711153	0.0142611	0.217575	0	0.26212	1.39985	0.089291	0	0.0158147	0.049554	0.0571467	0
Phycisphaerae	0.0346904	0.039931	0.0513719	0	0.0722379	0.165436	0.0119055	0.0226757	0.0316293	0.022024	0.0403388	0.00510491
Planctomycetacia	0.830091	0.132628	0.864257	0	0.321975	2.2843	0.428597	0.0907029	0.0988416	0.132144	0.507597	0.0969932
Planctomycetes_unclassified	0.822658	0.159724	0.637616	0.230017	0.926709	2.27157	0.226204	0.136054	0.11861	0.104614	0.531128	0.214406
Poribacteria_unclassified	0	0.00142611	0	0	0.142412	0	0	0	0	0	0	0
Alphaproteobacteria	27.7127	23.1158	34.812	4.14031	16.8046	26.3426	11.7983	9.31406	8.54782	5.45094	9.82587	9.77079
Betaproteobacteria	0.0371683	0.00142611	0.0483501	0	0.0392149	0.0827182	0.0297637	0.0113379	0	0.02753	0.023531	0
Deltaproteobacteria	0.431152	0.262404	0.698054	0	3.14545	0.362688	0.232157	0.175737	0.146286	0.08259	0.19161	0.495176
Gammaproteobacteria	57.4101	68.2135	41.433	87.8091	55.5303	46.9267	82.1418	85.3118	84.6598	89.9681	68.455	80.0398
Oligoflexia	0.379116	0.268108	0.704098	0	0.447875	0.254518	0.0654801	0.085034	0.0434903	0.011012	0.0201694	0.0102098
Proteobacteria_unclassified	0.750799	0.323726	1.10903	0	0.569648	1.85798	0.154771	0.221088	0.130471	0.115626	0.393304	0.199091
Rhodothermia	0.178408	0.0470615	0.0634594	0	0.0598543	0.369051	0.0595274	0.0283447	0.0316293	0.05506	0.174802	0.142937
Spirochaetia	0	0	0.00302188	0	0	0	0	0	0.0158147	0	0.0168079	0.0306294
Opitutae	0.0520356	0.00713053	0.075547	0	0.0288952	0.0509035	0.244062	0.00566893	0.00395366	0.044048	0.0537851	0
Subdivision3	0.0272567	0.0142611	0.0120875	0	0.0123836	0.0445406	0.0119055	0.0170068	0.011861	0.005506	0	0.0306294
Verrucomicrobia_unclassified	0.0619471	0.00998274	0.0543938	0	0.175435	0.451769	0.0178582	0	0	0.05506	0.272287	0.331819
Verrucomicrobiae	0.577347	0.0812881	0.815907	0	0.142412	1.24077	0.255968	0.0340136	0.0276756	0.066072	0.369773	0.0306294
sum	100	100	100	100	100	100	100	100	100	100	100	100

## Sheet: genus_level
treatment	Isopora (before heating)			Isopora (24 h at 31oC)			Platygyra (before heating)			Platygyra (24 h at 31oC)
label/replications	I0H1	I0H2	I0H3	I24H1	I24H2	I24H3	P0H1	P0H2	P0H3	P24H1	P24H2	P24H3
	relative abundance (%)
Gp10_unclassified	0.329559	0.0256699	0.220597	0	0.0908134	1.07534	0.345259	0.00566893	0.011861	0.08259	0.184886	0.0153147
Gp11_unclassified	0	0	0	0	0.123836	0	0	0	0	0	0	0
Gp21_unclassified	0.086726	0.00570443	0	0	0.0515985	0.0127259	0	0	0	0	0	0
Gp22_unclassified	0.0941596	0.00713053	0.099722	0	0.0908134	0.235429	0.00595274	0.0170068	0.00395366	0.011012	0.0739546	0.0204196
Gp26_unclassified	0.0173452	0.00570443	0.00906564	0	0.0185755	0.152711	0	0	0.00395366	0	0.0134463	0
Acidobacteria_Gp3_unclassified	0.00247788	0	0.0211531	0	0	0	0	0	0	0	0	0
Acidobacteria_unclassified	0.0743365	0.00427832	0.0846126	0	0.0309591	0.279969	0.0654801	0	0.011861	0.242264	0.0403388	0
Aridibacter	0.0297346	0	0.00604376	0	0	0.0190888	0	0	0	0.005506	0.070593	0
Blastocatellaceae_unclassified	0.086726	0.00142611	0.190378	0	0	0.0636294	0.00595274	0.00566893	1.87799	0.011012	1.12949	0.612589
Acanthopleuribacter	0.106549	0.00998274	0	0	0.00619182	0	0	0	0	0.02753	0	0
Vicinamibacter	0.00495577	0.00142611	0	0	0.00412788	0.0127259	0	0	0	0	0	0
Vicinamibacteraceae_unclassified	0.0297346	0.00142611	0.00604376	0	0.0185755	0.184525	0	0	0	0	0.00672314	0
Acidimicrobiales_unclassified	0.416285	0.00855664	0.199444	0	0.0268312	0.750827	0.0357164	0.0113379	0.00395366	0.115626	0.0672314	0.0153147
Aquihabitans	0.0792923	0.0185394	0.099722	0	0.0165115	0.235429	0.0238109	0.0283447	0.00790733	0	0.0974855	0.0408392
Iamiaceae_unclassified	0.0693808	0.00142611	0.0936782	0	0.107325	0.114533	0.0238109	0	0.00790733	0.011012	0.0605083	0
Ilumatobacter	0.042124	0.00855664	0.199444	0	0.0908134	0.209977	0.0178582	0.0170068	0.00790733	0	0.0638698	0.00510491
Brevibacterium	0.00495577	0	0.00302188	0	0	0	0	0	0.00395366	0	0	0
Janibacter	0	0	0.0120875	0	0.00206394	0	0	0	0	0	0	0
Microbacterium	0.00743365	0.00142611	0.347516	0	0.00619182	0.00636294	0.00595274	0	0	0	0	0.0102098
Rothia	0.0817702	0.00570443	0.0423063	0	0.0495346	0.0127259	0	0.00566893	0.00395366	0.005506	0.00336157	0.0663638
Corynebacterium	0.00247788	0.00142611	0	0	0.0123836	0.0190888	0	0	0	0	0.00336157	0.00510491
Gordonia	0	0	0.0453282	0	0	0	0	0	0	0	0	0
Lawsonella	0	0	0	0	0	0	0	0	0	0	0.00336157	0.0102098
Cutibacterium	0.00991154	0.00142611	0.0120875	0	0.0165115	0.0127259	0	0	0	0	0.0100847	0.0306294
Pseudonocardia	0.00991154	0.00142611	0.024175	0	0	0	0	0.00566893	0	0	0	0.00510491
Actinobacteria_unclassified	0.0545135	0.00713053	0.0967001	0	0.0309591	0.159074	0	0	0	0.005506	0.0302541	0.00510491
Gaiella	0	0	0.00604376	0	0	0.0254518	0	0	0	0	0	0
Bacteria_unclassified	4.79223	3.32853	11.7249	0.172513	5.45087	8.69178	2.00607	3.19728	2.7557	2.16386	7.68455	5.44693
Bacteroidales_unclassified	0.0322125	0.0185394	0.00604376	0	0.0268312	0.0190888	0.00595274	0.0170068	0.047444	0.011012	0.0302541	0.0408392
Cytophagales_unclassified	0.0669029	0.054192	0.099722	0	0.154796	0.159074	0.0773856	0.113379	0.0988416	0.099108	0.275649	0.204196
Fulvivirga	0.00991154	0.00142611	0.00302188	0	0.00206394	0	0	0.0170068	0	0	0	0
Microscilla	0	0.00142611	0	0	0	0.00636294	0.0357164	0	0	0	0	0
Reichenbachiella	0.00247788	0.00142611	0.00604376	0	0.00825576	0	0	0	0	0.005506	0	0
Roseivirga	0.0272567	0.00570443	0.0151094	0	0.0103197	0.0318147	0.0297637	0.00566893	0.011861	0	0.0874008	0.0204196
Cryomorphaceae_unclassified	0.0396462	0.0142611	0	0	0.0103197	0	0	0	0.0158147	0	0.00336157	0.0102098
Aquimarina	0	0.00855664	0.0120875	0	0.0309591	0.00636294	0.089291	0.00566893	0.011861	0.005506	0.121017	0.0357343
Ascidiimonas	0	0	0.0362625	0	0	0	0	0	0	0	0	0
Aureicoccus	0	0.00142611	0	0	0	0	0	0	0	0	0.00672314	0
Flavobacteriaceae_unclassified	0.0991154	0.00427832	0.0302188	0	0.0165115	0.0190888	0.285731	0	0.011861	0.071578	0.10757	0.00510491
Kordia	0.00495577	0.00142611	0.00302188	0	0.0577903	0.00636294	0.0119055	0.00566893	0.023722	0.005506	0	0
Muricauda	0.00495577	0.00570443	0.00302188	0	0	0	0.0178582	0	0.011861	0.011012	0.070593	0.0153147
Pseudotenacibaculum	0	0	0.00604376	0	0	0	0.19644	0	0.0158147	0.005506	0.00672314	0.00510491
Tenacibaculum	0.0173452	0.00427832	0.00302188	0	0.00206394	0	0.00595274	0.0113379	0.011861	0.005506	0.00672314	0.0102098
Wenyingzhuangia	0.00247788	0	0.00302188	0	0	0	0.0178582	0.0283447	0.023722	0	0.00336157	0
Winogradskyella	0.00495577	0	0.00604376	0	0.0288952	0	0.0297637	0.0170068	0.0158147	0.011012	0.0437004	0.00510491
Flavobacteriales_unclassified	0.106549	0.00285221	0	0	0	0	0.00595274	0.0113379	0.0158147	0	0.00672314	0.00510491
Flavilitoribacter	0.00495577	0	0	0	0.00206394	0	0	0	0.00790733	0	0.00336157	0.00510491
Lewinellaceae_unclassified	0	0	0.00604376	0	0	0	0	0	0	0	0.0134463	0
Phaeodactylibacter	0	0	0.00604376	0	0	0.00636294	0.0357164	0.0113379	0.00395366	0	0.023531	0
Saprospirales_unclassified	0.0322125	0.012835	0.00604376	0	0.00206394	0.0127259	0.0357164	0.0453515	0.011861	0	0.0268926	0.0204196
Balneola	0.0396462	0.00142611	0	0	0	0	0.00595274	0	0.00395366	0	0.0201694	0
Arcobacteraceae_unclassified	0.126372	0.012835	0.335429	0	3.54998	0.0509035	0.0119055	0.0170068	0.0593049	0	0.00672314	0.117413
Halarcobacter	0.0198231	0.00998274	0.00604376	0.0575043	1.57066	0	0	0	0.0593049	0	0.00336157	0.107203
Poseidonibacter	0.0297346	0	0	0	3.4798	0	0	0	0	0	0	0.00510491
Campylobacterales_unclassified	0.0247788	0	0	0	0.119709	0	0	0	0.11861	0	0.00336157	0.0714687
Sulfurovum	0	0.027096	0	0	0	0	0	0	0	0	0	0
Thiovulaceae_unclassified	0.00495577	0.00142611	0	0	0.829704	0	0	0	0.011861	0	0	0.122518
Campylobacteria_unclassified	0.188319	0	0	0	0.0454067	0	0	0	0	0	0	0
Candidatus_Saccharibacteria_unclassified	0.0569914	0.122645	0.0846126	0	0.109389	0.0572665	0.00595274	0.00566893	0.0158147	0.011012	0.0403388	0.0153147
Chlamydiales_unclassified	0.364249	1.04676	0.698054	0	1.10834	0.559939	0.0297637	0.0963719	0.122564	0.011012	0.0638698	0.132728
Estrella	0.0718587	0.678827	0.0936782	0	0.447875	0.0827182	0	0.0113379	0.0276756	0	0.0201694	0.00510491
Parachlamydia	0.0718587	0.885612	0.187356	0	0.716187	0.114533	0	0.0113379	0.0553513	0.005506	0	0.00510491
Parachlamydiaceae_unclassified	0.00247788	0.00855664	0.0120875	0	0.0330231	0.0190888	0	0.00566893	0	0	0.00336157	0.00510491
Simkania	0.113983	0.185394	0.129941	0	0.425172	0.337236	0.00595274	0.0170068	0.023722	0.038542	0.147909	0.132728
Prosthecochloris	0.00247788	0.00285221	0	0	0.00206394	0	0.0119055	0.0566893	0	0	6.52817	0.00510491
Anaerolineae_unclassified	0.141239	0	0.0664813	0	0.0804937	0.32451	0.0119055	0.0113379	0	0.02753	0.137824	0.0714687
Anaerolineaceae_unclassified	0.168496	0.0556181	0.0815907	0	0.0825576	0.146348	0.0773856	0.102041	0.0434903	0.104614	0.10757	0.0714687
Caldilineaceae_unclassified	0.0446019	0	0.0423063	0	0.070174	0.133622	0.0119055	0.00566893	0	0.011012	0.0100847	0
Litorilinea	0.0247788	0	0.0725251	0	0.202266	0.0445406	0	0	0	0	0.00336157	0
Chloroflexi_unclassified	0.587259	0.139758	0.607398	0	0.421044	0.789005	0.19644	0.175737	0.166054	0.231252	0.315988	0.193986
Roseiflexus	0.00743365	0	0	0	0	0	0	0	0	0	0	0
Nitrolancea	0	0	0.00302188	0	0	0.0890812	0.00595274	0	0	0	0.00336157	0
Cyanobacteria_unclassified	0.55009	0.396458	0.631573	0	0.189883	0.279969	0.392881	0.0680272	0.130471	0.41295	0.816862	0.0867834
Family_I_unclassified	0.00495577	0.00285221	0.00604376	0	0.0165115	0	0	0.00566893	0	0	0.0134463	0
GpIIa_unclassified	0	0.0199655	0	0	0	0	0	0	0	0	0	0
GpIV_unclassified	0.00495577	0.012835	0.00604376	0	0.00206394	0	0	0	0	0	0.0134463	0.00510491
GpIX_unclassified	0.0817702	0.0841403	0.284057	0	0.0371509	0.10817	0.00595274	0.0396825	0.0632586	0.005506	0.0369773	0.0357343
GpVI_unclassified	0.00247788	0	0.0513719	0	0	0	0	0	0	0	0.0100847	0.00510491
GpVIII_unclassified	0.00247788	0.00285221	0.0634594	0	0.00825576	0	0.00595274	0	0	0.005506	0.0437004	0
GpX_unclassified	0	0	0	0	0	0	0	0	0	0	0.0168079	0
GpXII_unclassified	0	0	0.11181	0	0	0	0	0	0	0	0	0
Calorithrix	0.0297346	0.00285221	0.0120875	0	0	0.0318147	0.0178582	0.0170068	0	0.02753	0.0369773	0.0153147
Deinococcus	0	0	0.646682	0	0	0	0	0	0	0	0	0
Exiguobacterium	0.0198231	0.00855664	0.102744	0	0.00412788	0	0	0.00566893	0.00395366	0	0.00336157	0.00510491
Staphylococcus	0.00743365	0.00285221	0.0151094	0	0	0	0	0	0.00395366	0	0.0268926	0.0102098
Clostridia_unclassified	0	0	0	0	0	0	0	0	0.047444	0	0.110932	0.372658
Clostridiaceae_1_unclassified	0.00991154	0	0.0151094	0	0	0	0	0.00566893	0	0	0	0
Oceanirhabdus	0.00247788	0	0.0362625	0	0.0887495	0.00636294	0	0	0	0	0	0
Clostridiales_unclassified	0.0817702	0.00713053	0.123897	7.59057	1.01752	0.0572665	0.0119055	0	0.0909343	0	0.0537851	0.0663638
Peptococcaceae_2_unclassified	0	0	0	0	0	0	0	0	0.011861	0	0.0100847	0.0306294
Peptostreptococcaceae_unclassified	0	0	0	0	0	0	0	0.294785	0.00790733	0	0.0100847	0.127623
Tepidibacter	0.00247788	0	0	0	0.00619182	0	0	0	0	0	0	0
Wukongibacter	0.00247788	0.00142611	0.0181313	0	0.00825576	0.00636294	0	0	0	0	0.00336157	0
Vallitalea	0	0	0.024175	0	0.0288952	0	0	0	0	0	0	0
Firmicutes_unclassified	0	0	0	0	0	0	0	0.0113379	0.00790733	0	0.0571467	0.107203
Propionigenium	0.00247788	0	0.00604376	0	0	0	0	0	0	0	0	0
Candidatus_Hydrogenedens_unclassified	0.00495577	0	0.00604376	0	0.00825576	0.0127259	0	0	0	0	0.00672314	0
Nitrospira	0.904428	0.0156872	0.24175	0	0.27244	1.50165	0.0952438	0	0.0158147	0.05506	0.0571467	0
Phycisphaeraceae_unclassified	0.0346904	0.039931	0.0513719	0	0.0722379	0.165436	0.0119055	0.0226757	0.0316293	0.022024	0.0403388	0.00510491
Mariniblastus	0.431152	0.0570443	0.311253	0	0.0557264	0.477221	0.345259	0.0283447	0.047444	0.099108	0.248756	0.0663638
Pirellulaceae_unclassified	0.0768144	0.00285221	0.075547	0	0.00825576	0.318147	0.0119055	0.00566893	0	0	0.0437004	0.00510491
Pirellulales_unclassified	0.0123894	0	0.00906564	0	0.00619182	0.0572665	0.0119055	0	0.00395366	0	0.0100847	0.00510491
Planctomycetacia_unclassified	0.287435	0.0527659	0.43515	0	0.243545	1.43166	0.0476219	0.0396825	0.0197683	0.005506	0.201694	0.00510491
Planctomycetaceae_unclassified	0.00495577	0.00285221	0.0302188	0	0.00206394	0	0	0	0	0.005506	0.00336157	0
Planctomycetales_unclassified	0.0173452	0.0171133	0.00302188	0	0.00619182	0	0.0119055	0.0170068	0.0276756	0.022024	0	0.0153147
Planctomycetes_unclassified	0.822658	0.159724	0.637616	0.230017	0.926709	2.27157	0.226204	0.136054	0.11861	0.104614	0.531128	0.214406
Poribacteria_unclassified	0	0.00142611	0	0	0.142412	0	0	0	0	0	0	0
Alphaproteobacteria_unclassified	3.44178	2.07641	2.39031	0.115009	2.42307	2.99695	1.0834	0.878685	0.925157	0.429468	0.981579	0.689162
Brevundimonas	0.0173452	0.00285221	0.534872	0	0.00619182	0	0	0	0.00395366	0	0	0
Asprobacter	0.0371683	0.0156872	0.0151094	0	0.0103197	0.00636294	0.00595274	0	0.00790733	0	0.0201694	0.0204196
Hirschia	0	0.0171133	0.0120875	0	0.00825576	0	0.00595274	0.0113379	0	0	0	0
Hyphomonadaceae_unclassified	0.22301	0.215342	0.148072	0	0.158923	0.101807	0.279779	0.136054	0.0711659	0.13765	0.309264	0.28077
Hyphomonas	0	0	0	0	0	0	0.00595274	0	0	0.011012	0	0
Litorimonas	0.00495577	0.0185394	0.00604376	0	0.0268312	0	0.00595274	0.0170068	0.00395366	0.093602	0.00672314	0.00510491
Maricaulis	0.00247788	0.00570443	0	0	0.0227033	0.00636294	0	0.0170068	0.0276756	0.005506	0.0100847	0.0510491
Ponticaulis	0.00247788	0.0171133	0.00302188	0	0.0103197	0	0	0.0340136	0.00395366	0	0.0100847	0.0153147
Aestuariispira	0	0	0.0120875	0	0.00206394	0	0.0833383	0	0	0	0	0
Kordiimonas	0.0272567	0.517677	0.0120875	0	0.20433	0.00636294	0	0	0.00790733	0	0.0100847	0.0153147
Eilatimonas	0.00247788	0.00427832	0.187356	0	0	0	0	0	0	0	0	0
Marinicaulis	0.170974	0.0484876	0.102744	0	0.0908134	0.0954441	0.0952438	0.0226757	0.0197683	0.093602	0.0336157	0.0408392
Parvularcula	0.0173452	0.0242438	0.00604376	0	0.0247673	0.0190888	0.0119055	0.0340136	0.00790733	0	0.00672314	0.0510491
Parvularculaceae_unclassified	0.143717	0.125497	0.0362625	0	0.0433428	0	0.0297637	0.0453515	0.0593049	0.071578	0.047062	0.0867834
Ahrensiaceae_unclassified	0.0916817	0.027096	0.0634594	0	0.0165115	0.101807	0.0654801	0.0113379	0.0197683	0.121132	0.10757	0.0102098
Acuticoccus	0.0346904	0.0228177	0.075547	0	0.206394	0.687198	0	0	0	0	0.0168079	0.0510491
Brucella	0.0198231	0.00285221	0.120875	0	0	0.00636294	0	0	0	0.005506	0	0
Cohaesibacter	0.022301	0.00570443	0.0604376	0	0.802873	0.0127259	0	0	0.00790733	0.005506	0	0.0255245
Devosia	0	0	0.0332407	0	0	0	0	0	0	0	0	0
Devosiaceae_unclassified	0.0594692	0.0370788	0.0120875	0	0.0247673	0.0127259	0.00595274	0.0226757	0.0316293	0	0.0100847	0.0357343
Filomicrobium	1.13735	0.195377	0.395866	0	0.105261	0.254518	0.0714328	0.0793651	0.0672123	0.022024	0.070593	0.0714687
Hyphomicrobiaceae_unclassified	2.72815	0.734445	0.556026	0	0.35087	0.598117	0.107149	0.102041	0.106749	0.02753	0.0874008	0.0663638
Hyphomicrobium	0.00743365	0	0.0271969	0	0.00206394	0.0890812	0.00595274	0	0	0.016518	0.0168079	0
Methyloceanibacter	0.830091	0.21962	0.963979	0	0.369445	1.38712	0.0476219	0.0793651	0.0632586	0.033036	0.252118	0.26035
Bauldia	0.0198231	0.00427832	0.00604376	0	0.035087	0.0381777	0.0119055	0	0	0	0	0
Anderseniella	0.0198231	0.00142611	0.0181313	0	0.0144476	0.0318147	0.0119055	0	0	0.016518	0.047062	0
Phyllobacteriaceae_unclassified	0.173452	0.0213916	0.114831	0	0.0784298	0.146348	0.0238109	0.0170068	0	0.022024	0.0672314	0.0255245
Rhizobiaceae_unclassified	0	0	0.00906564	0	0	0	0	0	0	0	0	0
Rhizobiales_unclassified	1.99222	0.38077	3.83174	0	0.679037	2.51336	0.857194	0.136054	0.154193	0.286312	0.7698	0.26035
Pseudovibrio	0.0247788	0.00285221	0.2901	0	0.0825576	0.0318147	0.0357164	0.0113379	0.00395366	0	0	0
Roseibium	0.0346904	0.0213916	0.0876345	0.287522	0.183691	0.279969	0.178582	0.0226757	0.00790733	0.08259	0.094124	0.0408392
Stappiaceae_unclassified	0.064425	0.0171133	0.0302188	0	0.0330231	0.152711	0	0.00566893	0.00395366	0.011012	0.0302541	0.0204196
Actibacterium	0.064425	0.0299482	0.0151094	0	0.0309591	0.0572665	0.0357164	0.0396825	0.047444	0.02753	0.0268926	0.132728
Amaricoccus	0.123894	0.0513398	0.108788	0	0.0846216	0.0954441	0.0476219	0.0907029	0.0909343	0.038542	0.0504236	0.163357
Leisingera	0.136284	0.126923	0.151094	0	0.22497	0.133622	0.0119055	0.0283447	0.0513976	0	0.0336157	0.0102098
Marimonas	0.12885	0.601817	0.172247	0	0.123836	0.197251	0.0535746	0.334467	0.268849	0.181698	0.141186	0.183777
Maritimibacter	0.042124	0.0470615	0.00906564	0	0.0144476	0.00636294	0.0178582	0.0566893	0.0909343	0.016518	0.0302541	0.0969932
Oceanicella	0.00495577	0	0.00906564	0	0.111453	0.101807	0	0	0	0	0.0134463	0
Paracoccus	0.0148673	0	11.5768	0	0.0185755	0	0	0	0	0.005506	0	0
Paroceanicella	1.28354	0.419275	0.794754	0	0.152732	0.496309	0.113102	0.323129	0.173961	0.077084	0.117655	0.342029
Rhodobacteraceae_unclassified	1.97735	1.63574	1.3266	0.0575043	1.09182	2.36701	1.51795	3.71882	3.2934	1.31593	1.84214	4.19113
Roseivivax	0.00495577	0	0.00604376	0	0	0	0	0	0.00395366	0	0	0
Roseovarius	0.0446019	0.00570443	0.00906564	0	0	0.0190888	0.089291	0	0	0.011012	0.0369773	0.00510491
Ruegeria	4.04886	1.48743	5.26713	0	0.998947	5.74574	5.0003	1.28118	1.09121	1.31593	2.25898	1.06693
Shimia	7.13383	13.1031	3.76828	0.172513	6.47252	6.31204	1.28579	1.4059	1.48658	0.528576	1.21353	0.760631
Tateyamaria	0.0594692	0.0313743	0.0513719	0	0.0268312	0.0254518	0.00595274	0.0170068	0.011861	0.011012	0.0201694	0.00510491
Rhodobacterales_unclassified	0.104071	0.10268	0.0181313	0	0.0474706	0.0190888	0.0595274	0.0736961	0.0869806	0.033036	0.0605083	0.127623
Roseomonas	0.00991154	0	0.0151094	0	0	0	0	0	0	0	0	0.00510491
Tagaea	0	0.00142611	0.00604376	0	0	0	0	0	0	0	0.00672314	0.00510491
Rhodospirillales_unclassified	0.530267	0.0955491	0.646682	0.0575043	0.257993	0.909901	0.13096	0.0566893	0.0553513	0.088096	0.248756	0.0612589
Pelagibius	0.00247788	0	0.00302188	0	0.00206394	0.00636294	0	0	0	0	0.0336157	0
Terasakiella	0.364249	0.357953	0.199444	3.45026	0.97418	0.101807	0	0.0113379	0.0395366	0	0.0134463	0.00510491
Nisaea	0	0	0	0	0	0	0.089291	0	0.00395366	0	0	0
Thalassobaculaceae_unclassified	0	0.00142611	0	0	0	0	0.00595274	0.0736961	0.0395366	0.005506	0.282372	0.311399
Thalassobaculum	0.0520356	0.00427832	0	0	0	0.0127259	0	0	0	0	0	0
Thalassospiraceae_unclassified	0	0	0	0	0.0103197	0	0	0	0	0	0.0638698	0
Rickettsiaceae_unclassified	0	0.00427832	0	0	0	0	0	0	0	0	0	0
Altererythrobacter	0.0297346	0	0.00302188	0	0.00206394	0	0.0535746	0	0	0.005506	0	0.0102098
Erythrobacter	0.173452	0.206785	0.14505	0	0.13622	0.133622	0.220251	0.0963719	0.0909343	0.121132	0.295818	0.127623
Blastomonas	0	0	0	0	0	0	0	0	0	0.05506	0	0
Sphingomonas	0.00247788	0	0.311253	0	0	0	0	0	0	0	0	0
Sphingorhabdus	0.0148673	0.0185394	0.024175	0	0.00619182	0.0254518	0.0297637	0.0226757	0.0158147	0.121132	0.0302541	0.0357343
Sphingomonadales_unclassified	0.00991154	0	0.0120875	0	0	0	0	0	0	0	0	0
Betaproteobacteria_unclassified	0.0123894	0	0.00906564	0	0.0185755	0.0318147	0	0	0	0.022024	0.0201694	0
Neisseriaceae_unclassified	0.00495577	0	0.0271969	0	0.0123836	0.00636294	0	0.0113379	0	0	0	0
Methylophilaceae_unclassified	0	0	0	0	0	0	0.0238109	0	0	0.005506	0.00336157	0
Nitrosomonadales_unclassified	0.0198231	0.00142611	0.0120875	0	0.00825576	0.0445406	0.00595274	0	0	0	0	0
Vampirovibrio	0	0.00570443	0	0	0	0	0	0	0.00790733	0	0	0
Deltaproteobacteria_unclassified	0.00991154	0.00713053	0.0181313	0	0.0185755	0.0445406	0.107149	0	0	0	0.00672314	0
Desulfocarbo	0	0	0	0	0	0	0	0	0	0	0.00672314	0
Desulfobacter	0	0	0	0	0.0165115	0	0	0	0	0	0	0
Desulfobacteraceae_unclassified	0.00743365	0	0.00604376	0	0.0825576	0.00636294	0	0.0566893	0.0672123	0	0.0403388	0.316504
Desulfobacterium	0	0	0	0	0.00619182	0	0	0	0	0	0	0
Desulfocella	0.106549	0	0	0	2.79664	0	0	0	0	0	0	0
Desulfofaba	0.00743365	0	0.0120875	0	0.0990692	0.0127259	0	0	0	0	0	0
Desulforhopalus	0	0	0	0	0	0	0.0178582	0	0	0	0	0
Halodesulfovibrio	0.0173452	0.0470615	0.0513719	0	0.0433428	0.0127259	0	0	0.00395366	0.005506	0	0
Pseudodesulfovibrio	0	0	0	0	0.00825576	0	0	0	0	0	0	0
Haliangium	0.00743365	0	0	0	0	0.00636294	0	0	0	0	0.0437004	0
Myxococcales_unclassified	0.232921	0.182542	0.0181313	0	0.0433428	0.0445406	0.0833383	0.119048	0.0672123	0.022024	0.0739546	0.132728
Nannocystaceae_unclassified	0.0346904	0.00427832	0.374713	0	0.0288952	0.171799	0	0	0	0.038542	0.0201694	0.0459442
Plesiocystis	0.00247788	0	0.184335	0	0	0.0190888	0	0	0	0.016518	0	0
Polyangiaceae_unclassified	0	0	0.00302188	0	0	0	0.0238109	0	0	0	0	0
Sandaracinus	0.00495577	0.0156872	0.0302188	0	0.00206394	0.0445406	0	0	0	0	0	0
Aeromonas	0.00495577	0	0.00906564	0	0.00412788	0	0	0	0	0	0	0
Aestuariibacter	0.00991154	0.121219	0.0151094	0	0.0392149	0	0.0119055	0.0226757	0.0316293	0.016518	0.0571467	0.0255245
Aliagarivorans	0.00495577	0	0	0	0.00619182	0	0.00595274	0.00566893	0	0	0	0.00510491
Aliiglaciecola	0.0123894	0.00855664	0.00302188	0	0	0	0.0119055	0.0113379	0.0158147	0.005506	0.00672314	0
Alteromonadaceae_unclassified	0.118938	0.134054	0.00604376	0	0.0639822	0	0.0178582	0.42517	0.0434903	0.005506	0.0201694	0
Alteromonas	3.08744	2.8408	0.897498	2.12766	0.901942	0.731738	0.184535	0.646259	0.72352	0.30283	0.453812	0.398183
Marinobacter	0.0173452	0.00427832	0.00302188	0	0.00412788	0.00636294	0.00595274	0.00566893	0	0	0.00336157	0
Alteromonadales_unclassified	0.198231	0.134054	0.0120875	0	2.3467	0.0127259	0	0	0	0	0	0
Colwelliaceae_unclassified	0.43363	0	0	0	0.0268312	0	0.00595274	0	0.00395366	0	0	0
Thalassotalea	5.03011	11.9165	5.96217	0.115009	24.4536	4.84856	0.238109	0.867347	0.72352	0.517564	0.100847	0.265455
Ferrimonas	0.168496	0.0627487	4.43612	11.7309	0.920518	0.97353	0.00595274	0	0	0	0.0268926	0.00510491
Paramoritella	0.00247788	0.00285221	0.075547	0	0	0.0636294	0.0178582	0	0.00395366	0	0.0134463	0
Algicola	0	0.24529	0	0	0	0	0	0	0	0	0	0
Pseudoalteromonas	0.0396462	0.0313743	0.00302188	0	0.266248	0	0.250015	0.345805	0.454671	0.104614	0.0874008	0.168462
Psychrosphaera	1.01593	0.643174	0.918651	0.517539	2.83792	1.73708	0.238109	0.340136	0.434903	0.13765	0.144548	0.27056
Corallincola	0	0.0299482	0	0	0.425172	0	0	0	0	0.011012	0	0
Shewanellaceae_unclassified	0	0	0.00604376	0	0	0.139985	0	0	0	0	0	0
Arenicella	0.30478	0.116941	0.187356	0	0.0330231	0.0445406	0.333353	0.0113379	0.011861	0.159674	0.0638698	0.0102098
Perspicuibacter	0	0.00142611	0	0	0	0	0.160724	0.00566893	0	0	0	0
Cellvibrionaceae_unclassified	0.0346904	0.00142611	0.00604376	0	0	0	0	0	0	0.319348	0.0672314	0.00510491
Eionea	5.63967	4.49081	0.0846126	0	0.0722379	0.254518	0.440502	0.515873	0.656308	0.049554	0.0874008	0.158252
Exilibacterium	0.00247788	0	0.120875	0	0.00619182	0	0.00595274	0	0.00395366	0	0.00336157	0
Halioxenophilus	2.47788	1.02537	0.314275	0.0575043	0.953541	0.559939	0.648848	0.31746	0.375598	0.242264	0.396665	0.786155
Pseudomaricurvus	0.324603	0.298056	0.253838	0	1.04848	0.750827	0.0119055	0.0170068	0.0593049	0.033036	0.0773161	0.0612589
Pseudoteredinibacter	0	0	0.00302188	0	0.0949413	0	0	0	0	0	0	0
Cellvibrionales_unclassified	0.0495577	0.0142611	0.0664813	0	0.0371509	0.0763553	0.0119055	0.0113379	0.00395366	0.016518	0.0168079	0.0153147
Halieaceae_unclassified	0.0743365	0.0513398	0.25686	0	0.0495346	0.43268	0.0416691	0.0453515	0.0276756	0.005506	0.221864	0.0306294
Halioglobus	0.247788	0.0784358	0.311253	0	0.0970052	0.286332	0.0535746	0.0510204	0.0513976	0.044048	0.147909	0.056154
Parahaliea	0.00743365	0.00142611	0.0543938	0	0	0.0190888	0.0119055	0	0	0.005506	0.023531	0.00510491
Microbulbifer	0.00495577	0	0	0	0.00206394	0.0127259	0	0	0	0	0.00336157	0
Litorivivens	0.00247788	0	0	0	0.181627	0	0	0	0	0	0	0
Chromatiaceae_unclassified	0	0	0.0151094	0	0.0309591	0.0190888	0	0	0	0	0.00336157	0
Chromatiales_unclassified	1.57593	0.0984013	1.72549	0	0.730635	4.02138	0.380975	0.0680272	0.0751196	0.236758	0.860562	0.0663638
Ectothiorhodospiraceae_unclassified	0.141239	0.0385049	0.235707	0	0.0763658	0.801731	0.0773856	0.0226757	0.00395366	0.022024	0.0739546	0.00510491
Inmirania	0.00743365	0	0.0392844	0	0.0185755	0.197251	0.00595274	0	0	0.005506	0.0302541	0
Wenzhouxiangella	0.00991154	0	0	0	0	0	0	0	0	0	0	0
Woeseia	0.0916817	0.0328004	0.154116	0	0.0309591	0.292695	0.0238109	0.0170068	0.011861	0.033036	0.164717	0.0204196
Raoultella	0	0	0.00906564	0	0	0.00636294	0	0	0	0	0.00336157	0
Marinicella_unclassified	0.0247788	0	0	0	0	0	0.0238109	0	0	0	0	0
Gammaproteobacteria_unclassified	29.1176	38.4806	19.0227	0.747556	11.428	25.3945	14.7152	22.4093	20.6856	7.73043	12.4277	21.2517
Aquicella	0	0.00998274	0.00906564	0	0.00825576	0.0318147	0.0119055	0	0	0	0	0
Coxiella	0.0247788	0.054192	0.0483501	0	0.0598543	0.114533	0.00595274	0.00566893	0.011861	0	0	0.00510491
Endozoicomonas	0.413807	1.95804	0.0332407	0.0575043	0.0247673	0.0254518	62.6644	56.9785	58.3916	78.433	52.1413	55.6945
Parendozoicomonas	0	0.00427832	0.00604376	0	0	0	0.089291	0.124717	0.170008	0.033036	0.10757	0.0816785
Hahellaceae_unclassified	0.00495577	0	0	0	0.00206394	0	0	0	0	0	0	0
Aliikangiella	0.042124	0.0584704	0.0906564	0	0.284824	0.0381777	0.0297637	0.0510204	0.0276756	0.049554	0.0268926	0.0663638
Pleionea	0.267612	0.00285221	0.232685	0	0.00412788	0	0.0119055	0	0	0.005506	0.00336157	0.00510491
Amphritea	0.00495577	0	0	0	0.00412788	0	0	0.00566893	0.011861	0.011012	0	0
Motiliproteus	0.0247788	0	0.0785688	0	0.0103197	0.0699924	0	0	0	0	0	0
Neptuniibacter	3.24603	1.17939	0.426085	3.79528	1.04435	2.89514	0.577415	1.27551	0.818408	0.264288	0.379857	0.209301
Oceanospirillaceae_unclassified	1.57098	1.78976	0.758491	0.0575043	2.76981	0.897175	0.0119055	0.153061	0.0790733	0.104614	0.023531	0.0459442
Oceanospirillum	0.0272567	0.00427832	0.0392844	0.172513	0.0825576	0	0	0.0170068	0.011861	0.011012	0	0.00510491
Reinekea	0.00495577	0	0	0	0.13622	0.0254518	0	0.0793651	0.0197683	0.115626	0.0268926	0.0102098
Pseudohongiella	0.0198231	0.00285221	0.0513719	0	0.0144476	0.0381777	0.0119055	0	0	0.038542	0.0302541	0
Oceanospirillales_unclassified	0.0768144	1.43894	0.0815907	0	0.00619182	0.0699924	0.0119055	0.0283447	0	0.005506	0.0134463	0.0102098
Acinetobacter	0.00247788	0.00142611	0.0120875	0	0	0	0	0	0.00790733	0.005506	0	0
Moraxella	0.022301	0	1.75873	0	0.0330231	0.0190888	0	0	0	0.005506	0	0
Pseudomonas	0.0520356	0.00855664	0.14505	0	0.0268312	0.0445406	0	0	0	0.011012	0.00336157	0.0204196
Cysteiniphilum	0.00743365	0.00570443	0	0	0	0	0	0	0	0	0	0
Francisella	0.00495577	0.318022	0.00302188	0	0.0288952	0	0	0.0170068	0.0632586	0.005506	0	0
Francisellaceae_unclassified	0.0173452	0.0556181	0.024175	0	0.0309591	0.0318147	0	0.0113379	0	0	0.00672314	0.0255245
Thiotrichales_unclassified	0.0148673	0.027096	0.0302188	0	0.00412788	0.00636294	0	0.00566893	0.023722	0.011012	0.0100847	0
Photobacterium	0.0569914	0.00570443	0.915629	3.73778	0.148604	0.235429	0.488124	0.0113379	0.0316293	0.005506	0.0268926	0.00510491
Vibrio	0.966375	0.142611	0.722229	62.6797	2.73885	0.598117	0.285731	0.385488	0.585142	0.847924	0.0672314	0.239931
Vibrionaceae_unclassified	0.022301	0.00855664	0.00302188	2.01265	0.850344	0.0254518	0	0	0.00395366	0	0	0.00510491
Xanthomonadales_unclassified	0.230443	0.232455	0.75547	0	0.0288952	0.0763553	0	0	0	0	0	0
Bacteriovoracales_unclassified	0.00495577	0.00142611	0.00906564	0	0.00825576	0	0	0	0.011861	0	0	0
Halobacteriovorax	0.250266	0.154019	0.126919	0	0.410724	0.114533	0.0357164	0.0566893	0.023722	0.011012	0.0134463	0.00510491
Oligoflexus	0	0	0.00302188	0	0.00825576	0.00636294	0	0	0	0	0	0
Oligoflexales_unclassified	0.00495577	0.00142611	0.024175	0	0	0	0	0	0	0	0	0.00510491
Pseudobacteriovorax	0.118938	0.111236	0.540916	0	0.0206394	0.133622	0.0297637	0.0283447	0.00790733	0	0.00672314	0
Proteobacteria_unclassified	0.750799	0.323726	1.10903	0	0.569648	1.85798	0.154771	0.221088	0.130471	0.115626	0.393304	0.199091
Rhodothermales_unclassified	0.0669029	0.0328004	0.00604376	0	0.0495346	0.139985	0.0178582	0	0.00395366	0.005506	0.0739546	0.0714687
Rubrivirga	0.022301	0.00142611	0	0	0	0.0445406	0	0	0.00395366	0	0.0168079	0
Roseithermus	0.0272567	0.00427832	0.00906564	0	0	0.0763553	0.0119055	0.00566893	0.00395366	0.02753	0.00672314	0.0102098
Salisaetaceae_unclassified	0.0619471	0.00855664	0.0483501	0	0.0103197	0.10817	0.0297637	0.0226757	0.0197683	0.022024	0.0773161	0.0612589
Spirochaetaceae_unclassified	0	0	0.00302188	0	0	0	0	0	0	0	0.00672314	0
Spirochaetales_unclassified	0	0	0	0	0	0	0	0	0.0158147	0	0.0100847	0.0306294
Opitutae_unclassified	0.00247788	0	0.00604376	0	0.00206394	0.00636294	0	0	0	0	0.0168079	0
Opitutaceae_unclassified	0.00247788	0.00142611	0.00604376	0	0	0	0	0	0	0	0.00672314	0
Cerasicoccus	0	0.00142611	0.00302188	0	0	0.0127259	0.0238109	0	0.00395366	0	0.0168079	0
Coraliomargarita	0	0.00142611	0.0151094	0	0.00206394	0	0.00595274	0.00566893	0	0	0	0
Pelagicoccus	0.022301	0.00142611	0.0362625	0	0.0144476	0.0318147	0.214298	0	0	0.016518	0.00672314	0
Puniceicoccaceae_unclassified	0.0247788	0.00142611	0.00906564	0	0.0103197	0	0	0	0	0.02753	0.00672314	0
Subdivision4_unclassified	0.0272567	0.0142611	0.0120875	0	0.0123836	0.0445406	0.0119055	0.0170068	0.011861	0.005506	0	0.0306294
Verrucomicrobia_unclassified	0.0619471	0.00998274	0.0543938	0	0.175435	0.451769	0.0178582	0	0	0.05506	0.272287	0.331819
Rubritalea	0.0123894	0.00142611	0.172247	0	0	0.0636294	0.00595274	0.0170068	0	0	0.00336157	0
Haloferula	0.232921	0.0427832	0.123897	0	0.0103197	0.0381777	0	0	0.00395366	0.005506	0.0134463	0.0204196
Haloferula	0.022301	0	0.00604376	0	0	0	0	0	0	0	0.00672314	0
Luteolibacter	0	0	0	0	0	0.0127259	0.0357164	0	0	0	0.00336157	0
Verrucomicrobiaceae_unclassified	0.237877	0.0342266	0.468391	0	0.115581	1.10715	0.19644	0.0170068	0.023722	0.060566	0.326072	0
Verrucomicrobiales_unclassified	0.0718587	0.00285221	0.0453282	0	0.0165115	0.0190888	0.0178582	0	0	0	0.0168079	0.0102098
sum	100	100	100	100	100	100	100	100	100	100	100	100
sum of unclassified	62.3262	58.0268	64.4536	13.226	47.0186	73.632	26.1801	36.6667	34.9227	17.3659	40.1977	42.6106
