# Supplementary material for: Extra high superoxide dismutase in host tissue is associated with improving bleaching resistance in “thermal adapted” and Durusdinium trenchii-associating coral
Source: PeerJ. 2022 Jan 12;10:e12746. doi: 10.7717/peerj.12746 (PMC8760857; doi:10.7717/peerj.12746)
Supplement: Supplemental Information 12 [file peerj-10-12746-s012.xlsx]

## Sheet: phylum level
treatment	Isopora (before heating)			Isopora (24 h at 31oC)			Platygyra (before heating)			Platygyra (24 h at 31oC)
label/replications	I0H1	I0H2	I0H3	I24H1	I24H2	I24H3	P0H1	P0H2	P0H3	P24H1	P24H2	P24H3
	relative abundance (%)
Acidobacteria	0.98083	0.162129	1.22548	0	0.995591	2.47111	0.645393	0.820653	2.60656	0.494692	1.78912	1.25725
Actinobacteria	0.779698	0.0564555	1.18899	0	0.360152	1.55163	0.107565	0.0683878	0.035652	0.138958	0.344193	0.195002
AncK6	0	0	0	0	0.0538157	0	0	0	0	0	0	0
Bacteroidetes	0.68534	0.212794	0.340581	0	0.476062	0.683226	1.0159	0.387531	0.392172	0.322383	7.72901	0.574742
BRC1	0	0	0	0	0	0.0191559	0	0	0	0	0	0
Calditrichaeota	0.0372467	0.00289515	0.0121636	0	0	0.0383117	0.0239034	0.00569898	0	0.0277917	0.0408942	0.00513163
Chlamydiae	0.75735	3.0732	1.22852	0	2.94538	1.15574	0.0358551	0.148173	0.249564	0.0611417	0.248773	0.302766
Chloroflexi	1.02056	0.205556	0.960924	0	1.67243	1.83896	0.304769	0.296347	0.213912	0.383525	0.616821	0.348951
Cyanobacteria	0.727553	0.602192	1.2863	0	0.293917	0.459741	0.442213	0.153872	0.225796	0.539158	1.00532	0.210397
Dadabacteria	0.787147	0.163576	0.632507	0	0.229752	0.938637	0.131469	0.0911837	0.138647	0.0611417	0.306707	0.153949
Deinococcus-Thermus	0.0273143	0.0159233	0.705489	0	0.00413967	0.044697	0.041831	0.0227959	0.0396134	0.00555833	0.0068157	0.0153949
Entotheonellaeota	0.0670441	0.00144758	0.0364908	0	0.120051	0.344806	0.0119517	0.00569898	0.0158453	0.00555833	0.0340785	0.00513163
Epsilonbacteraeota	0.394815	0.0521127	0.343622	0.0575043	9.62267	0.0510823	0.0119517	0.0170969	0.249564	0	0.0136314	0.425925
FCPU426	0	0	0.0030409	0	0	0	0	0	0	0.00555833	0	0
Firmicutes	0.126639	0.0202661	0.33754	7.59057	1.15704	0.0702382	0.0119517	0.319143	0.146569	0	0.323746	0.85185
Fusobacteria	0.00248311	0	0.0060818	0	0	0	0	0	0	0	0	0
Gemmatimonadetes	0.188717	0.010133	0.215904	0	0.494691	0.823702	0.0478069	0	0.011884	0.03335	0.1738	0.0153949
Halanaerobiaeota	0	0	0	0	0	0	0	0.0341939	0.233719	0	0.415758	1.85252
Hydrogenedentes	0.00496623	0	0.0060818	0	0.00827935	0.0319264	0	0	0	0	0.0068157	0
Kiritimatiellaeota	0.0173818	0.00144758	0.0091227	0	0.012419	0.140476	0.00597586	0	0	0	0.0613413	0
Latescibacteria	0.022348	0.00289515	0.0577771	0	0.0413967	0.0766235	0.0119517	0	0.00396134	0	0.0272628	0
Lentisphaerae	0.15147	0.00723788	0.0699407	0	0.0413967	0.0191559	0.0478069	0.0170969	0.0158453	0	0.0511178	0
Nitrospirae	1.01063	0.0159233	0.246313	0	0.312545	1.57717	0.0956137	0	0.0158453	0.0555833	0.0579335	0
Patescibacteria	0.163886	0.182395	0.17029	0.115009	0.138679	0.0638529	0.0956137	0.011398	0.0316907	0.016675	0.105643	0.0205265
PAUC34f	0.0471792	0.010133	0.0334499	0	0.51125	0.0702382	0.00597586	0	0	0.0111167	0.0102236	0
Planctomycetes	3.20818	0.739711	3.09564	0.230017	2.30787	8.09655	1.04578	0.39323	0.392172	0.450225	1.83683	0.554216
Poribacteria	0	0.00144758	0	0	0.089003	0	0	0	0	0	0	0
Proteobacteria	87.4528	93.9361	79.7385	92.0069	77.2608	76.8725	94.9624	95.9594	93.9827	96.6706	80.3469	91.6662
Spirochaetes	0	0	0.0030409	0	0	0	0	0	0.0158453	0	0.0170393	0.0307898
unclassified	0.536353	0.385055	6.9515	0	0.403618	0.708767	0.340624	1.19109	0.926953	0.539158	3.70774	1.1033
Verrucomicrobia	0.71762	0.114359	0.963965	0	0.360152	1.7815	0.531851	0.0569898	0.0435747	0.172308	0.705425	0.395135
WPS-2	0.0844259	0.0246088	0.130759	0	0.0869331	0.0702382	0.0239034	0	0.011884	0.00555833	0.0170393	0.0153949
sum	100	100	100	100	100	100	100	100	100	100	100	100

## Sheet: class level
treatment	Isopora (before heating)			Isopora (24 h at 31oC)			Platygyra (before heating)			Platygyra (24 h at 31oC)
label/replications	I0H1	I0H2	I0H3	I24H1	I24H2	I24H3	P0H1	P0H2	P0H3	P24H1	P24H2	P24H3
	relative abundance (%)
Acidobacteriia	0.0297974	0.00289515	0.0364908	0	0.0765728	0.0191559	0.00597586	0	0.00396134	0	0.0408942	0
Aminicenantia	0	0	0.0030409	0	0.136589	0	0	0	0	0	0	0
Blastocatellia_(Subgroup_5)	0.116706	0.00144758	0.197659	0	0	0.0830087	0.00597586	0.00569898	1.88164	0.016675	1.2166	0.615795
Holophagae	0.124156	0.0984352	0.480462	0	0.163493	0.00638529	0.203179	0.792158	0.697195	0.1334	0.153353	0.605532
Acidobacteria/Subgroup_11	0	0	0	0	0.124172	0	0	0	0	0	0	0
Acidobacteria/Subgroup_17	0.022348	0.00434273	0.0212863	0	0.0144868	0.0957793	0.00597586	0	0	0	0	0
Acidobacteria/Subgroup_21	0.086909	0.0057903	0	0	0.0724338	0.0127706	0	0	0	0	0	0
Acidobacteria/Subgroup_22	0.104291	0.00723788	0.106432	0	0.0931291	0.274567	0.00597586	0.0170969	0.00792267	0.0111167	0.0886041	0.0205265
Acidobacteria/Subgroup_26	0.0198649	0.00723788	0.0152045	0	0.0206954	0.159632	0	0	0.00396134	0.00555833	0.0511178	0
Acidobacteria/Subgroup_6	0.0521454	0.00289515	0.0060818	0	0.126242	0.306494	0.00597586	0	0	0	0.0068157	0
Acidobacteria/Subgroup_9	0.0595948	0.00289515	0.127718	0	0.0765728	0.351191	0	0	0	0	0.0204471	0
Thermoanaerobaculia	0.340187	0.0260564	0.225027	0	0.0910596	1.09827	0.412334	0.00569898	0.011884	0.327942	0.207879	0.0153949
Acidobacteria/unclassified	0.0248311	0.00289515	0.0060818	0	0	0.0638529	0	0	0	0	0.00340785	0
Acidimicrobiia	0.655542	0.0419797	0.684203	0	0.273179	1.46862	0.10159	0.0569898	0.0277294	0.1334	0.323746	0.0667111
Actinobacteria	0.116706	0.0115806	0.489585	0	0.0869205	0.0510823	0.00597586	0.011398	0.00792267	0.00555833	0.0204471	0.128291
Thermoleophilia	0.00744934	0.00289515	0.0152045	0	0	0.0319264	0	0	0	0	0	0
AncK6_cl	0	0	0	0	0.0538079	0	0	0	0	0	0	0
Bacteroidia	0.456893	0.141862	0.255436	0	0.353891	0.274567	0.926258	0.290648	0.348598	0.239008	0.851963	0.384872
Chlorobia	0.00248311	0.00289515	0	0	0.00206954	0	0.0119517	0.0569898	0	0	6.61805	0.00513163
Ignavibacteria	0.00744934	0.00723788	0.0212863	0	0.0600166	0.0383117	0.0119517	0.011398	0.00792267	0.0277917	0.0613413	0.041053
Rhodothermia	0.218514	0.0492176	0.0638589	0	0.0600166	0.370347	0.0657344	0.0284949	0.035652	0.0555833	0.197655	0.143686
Bacteroidetes/unclassified	0	0.0115806	0	0	0	0	0	0	0	0	0	0
BRC1_cl	0	0	0	0	0	0.0191559	0	0	0	0	0	0
Calditrichia	0.0372467	0.00289515	0.0121636	0	0	0.0383117	0.0239034	0.00569898	0	0.0277917	0.0408942	0.00513163
Chlamydiae	0.75735	3.0732	1.22852	0	2.94495	1.15574	0.0358551	0.148173	0.249564	0.0611417	0.248773	0.302766
Anaerolineae	0.968415	0.204108	0.87882	0	0.75952	1.50693	0.298793	0.296347	0.213912	0.383525	0.582743	0.348951
Chloroflexia	0.00744934	0	0.0030409	0	0	0.089394	0.00597586	0	0	0	0.00340785	0
Dehalococcoidia	0.00248311	0	0.0212863	0	0.722268	0.0702382	0	0	0	0	0.00340785	0
JG30-KF-CM66	0.0148987	0.00144758	0.0182454	0	0.0227649	0.0255412	0	0	0	0	0	0
KD4-96	0.0198649	0	0.0395317	0	0.0186258	0.127706	0	0	0	0	0.0272628	0
SHA-26	0	0	0	0	0.0393212	0	0	0	0	0	0	0
TK17	0	0	0	0	0.0538079	0.00638529	0	0	0	0	0	0
TK30	0	0	0	0	0.0558775	0.0127706	0	0	0	0	0	0
Chloroflexi/unclassified	0.00744934	0	0	0	0	0	0	0	0	0	0	0
Melainabacteria	0.0124156	0.0057903	0.0091227	0	0.026904	0.0383117	0	0	0.00792267	0	0.0068157	0.0102633
Oxyphotobacteria	0.675407	0.52547	1.26806	0	0.260762	0.389503	0.41831	0.125378	0.194106	0.516925	0.981461	0.133422
Sericytochromatia	0.0273143	0.0680361	0.0030409	0	0.00620861	0.0319264	0.0179276	0.0227959	0.023768	0.0222333	0.0170393	0.0564479
unclassified	0.0124156	0.00289515	0.0060818	0	0	0	0.00597586	0.00569898	0	0	0	0.0102633
Dadabacteriia	0.787147	0.163576	0.632507	0	0.229719	0.938637	0.131469	0.0911837	0.138647	0.0611417	0.306707	0.153949
Deinococci	0.0273143	0.0159233	0.705489	0	0.00413907	0.044697	0.041831	0.0227959	0.0396134	0.00555833	0.0068157	0.0153949
Entotheonellia	0.0670441	0.00144758	0.0364908	0	0.120033	0.344806	0.0119517	0.00569898	0.0158453	0.00555833	0.0340785	0.00513163
Campylobacteria	0.394815	0.0521127	0.343622	0.0575043	9.62127	0.0510823	0.0119517	0.0170969	0.249564	0	0.0136314	0.425925
FCPU426_cl	0	0	0.0030409	0	0	0	0	0	0	0.00555833	0	0
Bacilli	0.0273143	0.0115806	0.118595	0	0.00413907	0	0	0.00569898	0.00792267	0	0.0306707	0.0153949
Clostridia	0.0993246	0.00868546	0.218945	7.59057	1.15273	0.0702382	0.0119517	0.307745	0.134685	0	0.248773	0.805665
Firmicutes/unclassified	0	0	0	0	0	0	0	0.00569898	0.00396134	0	0.0443021	0.0307898
Fusobacteria	0.00248311	0	0.0060818	0	0	0	0	0	0	0	0	0
BD2-11_terrestrial_group	0.144021	0.010133	0.164209	0	0.475993	0.478897	0.0358551	0	0.011884	0.03335	0.14313	0.0153949
Gemmatimonadetes	0.022348	0	0.0212863	0	0.00620861	0.172403	0.0119517	0	0	0	0.0068157	0
PAUC43f_marine_benthic_group	0.022348	0	0.030409	0	0.0124172	0.172403	0	0	0	0	0.023855	0
Halanaerobiia	0	0	0	0	0	0	0	0.0341939	0.233719	0	0.415758	1.85252
Hydrogenedentia	0.00496623	0	0.0060818	0	0.00827815	0.0319264	0	0	0	0	0.0068157	0
Kiritimatiellae	0.0173818	0.00144758	0.0091227	0	0.0124172	0.140476	0.00597586	0	0	0	0.0613413	0
Latescibacteria_cl	0.0148987	0	0.0577771	0	0.0351821	0.0702382	0.0119517	0	0.00396134	0	0.023855	0
Latescibacteria/unclassified	0.00744934	0.00289515	0	0	0.00620861	0.00638529	0	0	0	0	0.00340785	0
Lentisphaeria	0.15147	0.00723788	0.0699407	0	0.0413907	0.0191559	0.0478069	0.0170969	0.0158453	0	0.0511178	0
Nitrospinia	0.233413	0.00144758	0.0243272	0	0.0124172	0.10855	0.00597586	0	0	0.00555833	0	0
P9X2b3D02	0.00744934	0	0.0030409	0	0.0372517	0.044697	0	0	0	0	0	0
Nitrospira	0.769766	0.0144758	0.218945	0	0.262831	1.42392	0.0896379	0	0.0158453	0.050025	0.0579335	0
ABY1	0.00993246	0.00434273	0.0060818	0	0.00206954	0	0.0119517	0.00569898	0.00792267	0	0.0170393	0.00513163
Parcubacteria	0.0968415	0.0535603	0.0790634	0.115009	0.026904	0.00638529	0.0776861	0	0.00792267	0.00555833	0.0477099	0
Saccharimonadia	0.0571116	0.124492	0.0851452	0	0.109685	0.0574676	0.00597586	0.00569898	0.0158453	0.0111167	0.0408942	0.0153949
PAUC34f_cl	0.0471792	0.010133	0.0334499	0	0.511175	0.0702382	0.00597586	0	0	0.0111167	0.0102236	0
BD7-11	0.0794597	0.0231612	0.0638589	0	0.0475993	0.153247	0.0478069	0.0170969	0.023768	0.0111167	0.0477099	0.0153949
OM190	1.47994	0.305439	1.40185	0	0.912666	3.85671	0.400382	0.148173	0.114879	0.161192	0.797437	0.271976
Phycisphaerae	0.295491	0.160681	0.255436	0.230017	0.761589	0.874784	0.0776861	0.108281	0.11884	0.0944917	0.231734	0.184739
Pla3_lineage	0.345153	0.0217136	0.328417	0	0.18005	0.868399	0.0239034	0.00569898	0.0158453	0.0277917	0.180616	0.00513163
Pla4_lineage	0.134088	0.0144758	0.121636	0	0.0351821	0.223485	0.0119517	0.00569898	0.00396134	0.0111167	0.0715649	0
Planctomycetacia	0.52642	0.0636933	0.428767	0	0.0724338	0.855629	0.370503	0.0341939	0.0514974	0.105608	0.310115	0.0769744
Planctomycetes/unclassified	0.188717	0.138967	0.231108	0	0.122103	0.261797	0.083662	0.0740867	0.0514974	0.0222333	0.0579335	0
vadinHA49	0.158919	0.0115806	0.264558	0	0.175911	1.00249	0.0298793	0	0.011884	0.016675	0.139722	0
Poribacteria_cl	0	0.00144758	0	0	0.0889901	0	0	0	0	0	0	0
Alphaproteobacteria	27.9152	23.5521	35.2532	4.14031	16.8833	26.4862	11.9398	9.39192	8.69117	5.58057	10.1724	9.93483
Deltaproteobacteria	1.7357	1.04949	2.66687	0.0575043	4.53849	3.12241	0.495996	0.678179	0.408018	0.211217	0.705425	1.17514
Gammaproteobacteria	57.6107	69.2593	41.7242	87.8091	55.7119	47.1043	82.4668	85.8038	84.832	90.8287	69.3941	80.4588
Betaproteobacteria	0.0372467	0.00144758	0.0486544	0	0.0393212	0.0830087	0.0298793	0.011398	0	0.0277917	0.023855	0
Magnetococcia	0	0	0	0	0.0144868	0	0	0	0	0	0	0
Proteobacteria/unclassified	0.153953	0.0738264	0.0456135	0	0.0765728	0.0766235	0.0298793	0.0740867	0.0514974	0.0222333	0.0511178	0.0975009
Spirochaetia	0	0	0.0030409	0	0	0	0	0	0.0158453	0	0.0170393	0.0307898
Bacteria/unclassified	0.536353	0.385055	6.9515	0	0.40356	0.708767	0.340624	1.19109	0.926953	0.539158	3.70774	1.1033
Verrucomicrobiae	0.71762	0.114359	0.963965	0	0.360099	1.7815	0.531851	0.0569898	0.0435747	0.172308	0.705425	0.395135
WPS-2_cl	0.0844259	0.0246088	0.130759	0	0.0869205	0.0702382	0.0239034	0	0.011884	0.00555833	0.0170393	0.0153949
Zixibacteria_cl	0	0	0	0	0.0144868	0	0	0	0	0	0	0
sum	100	100	100	100	100.014	100	100	100	100	100	100	100

## Sheet: genus level
treatment	Isopora (before heating)			Isopora (24 h at 31oC)			Platygyra (before heating)			Platygyra (24 h at 31oC)
label/replications	I0H1	I0H2	I0H3	I24H1	I24H2	I24H3	P0H1	P0H2	P0H3	P24H1	P24H2	P24H3
	relative abundance (%)
Aeromonas	0.004965	0	0.0091227	0	0.00413907	0	0	0	0	0	0	0
Aestuariibacter	0.00992999	0.123044	0.0152045	0	0.0393212	0	0.0119489	0.0227959	0.0316907	0.016675	0.0579335	0.0256581
Agaribacter	0.0372375	0.00868546	0.0060818	0	0	0	0	0.0170969	0.00396134	0	0	0
Aliiglaciecola	0.0124125	0.00868546	0.0030409	0	0	0	0.0119489	0.011398	0.0158453	0.00555833	0.0068157	0
Coralslurrinella	0	0.0303991	0	0	0.426325	0	0	0	0	0.0111167	0	0
Alteromonadaceae/unclassified	3.1627	2.95161	0.903147	2.12766	0.918874	0.734308	0.203131	1.06001	0.760577	0.305708	0.480507	0.400267
Alteromonadaceae/uncultured	0.0794399	0.81788	0.0091227	0	0.324917	0.0191559	0	0	0.00396134	0.00555833	0.0068157	0.0205265
Thalassotalea	3.98689	11.1304	5.33982	0.115009	23.7397	3.80563	0.233003	0.860546	0.720963	0.505808	0.0988277	0.266845
Colwelliaceae/unclassified	1.05258	0.965533	0.659875	0	0.780215	1.05996	0.00597443	0.011398	0.00396134	0.016675	0.00340785	0
Marinobacter	0.0173775	0.00434273	0.0030409	0	0.00413907	0.00638529	0.00597443	0.00569898	0	0	0.00340785	0
Paramoritella	0.0024825	0.00289515	0.0760225	0	0	0.0638529	0.0179233	0	0.00396134	0	0.0136314	0
Algicola	1.01782	0.90184	0.924434	0.517539	2.84561	1.74318	0.238977	0.341939	0.435747	0.138958	0.146538	0.271976
Pseudoalteromonas	0.03972	0.0318467	0.0030409	0	0.26697	0	0.250926	0.347638	0.455554	0.105608	0.0886041	0.169344
Agarivorans	0.004965	0	0	0	0.00620861	0	0.00597443	0.00569898	0	0	0	0.00513163
Ferrimonas	0.16881	0.0636933	4.46404	11.7309	0.923013	0.976949	0.00597443	0	0	0	0.0272628	0.00513163
Shewanella	0	0	0.0060818	0	0	0.140476	0	0	0	0	0	0
Alteromonadales/unclassified	0.697582	0.138967	0.0121636	0	2.64694	0.0191559	0.00597443	0	0.00396134	0.050025	0.00340785	0.0102633
Arenicella	0.305347	0.118701	0.188536	0	0.0331126	0.044697	0.334568	0.011398	0.011884	0.161192	0.0647492	0.0102633
HTCC5015	5.03451	5.09547	1.0187	0	0.229719	0.236256	1.19489	2.47906	2.08762	0.5336	0.473691	1.54462
Perspicuibacter	0	0.00144758	0	0	0	0	0.16131	0.00569898	0	0	0	0
Arenicellaceae/uncultured	0.0223425	0	0	0	0.00206954	0.00638529	0	0	0	0.0222333	0.0068157	0
AT-s2-59_ge	0.181222	0.0115806	0.340581	0	0.113825	0.657685	0.0238977	0.011398	0.00396134	0.0111167	0.184024	0.00513163
BD7-8_ge	0.312795	0.0057903	0.215904	0	0.0703642	0.600217	0.10754	0.011398	0	0.127842	0.235142	0
Eionea	5.65017	4.55842	0.0851452	0	0.0724338	0.255412	0.442108	0.518607	0.657582	0.050025	0.0886041	0.15908
Marinagarivorans	0.0223425	0	0	0	0	0	0	0	0	0.311267	0	0.00513163
Pseudomaricurvus	0.325207	0.302543	0.255436	0	1.05132	0.753464	0.0119489	0.0170969	0.0594201	0.03335	0.0783806	0.0615795
Pseudoteredinibacter	0	0	0.0030409	0	0.0951987	0	0	0	0	0	0	0
Cellvibrionaceae/unclassified	2.87473	1.13345	0.632507	0.0575043	1.00166	0.721538	0.693034	0.398929	0.447631	0.277917	0.494138	0.810797
Halioglobus	0.255697	0.0810643	0.37099	0	0.107616	0.383117	0.0537699	0.0569898	0.0514974	0.0444667	0.184024	0.0564479
Parahaliea	0.0074475	0.00144758	0.0547362	0	0	0.0191559	0.0119489	0	0	0.00555833	0.023855	0.00513163
Pseudohaliea	0.03972	0.037637	0.0699407	0	0.026904	0.0702382	0.0179233	0.0341939	0.023768	0.00555833	0.0988277	0.0256581
Halieaceae/unclassified	0.02979	0.0130282	0.136841	0	0.0144868	0.280953	0.0238977	0.00569898	0.00396134	0.0111167	0.105643	0.00513163
Microbulbifer	0.004965	0	0	0	0.00206954	0.0127706	0	0	0	0	0.00340785	0
Cellvibrionales/unclassified	0.00992999	0.0130282	0.0486544	0	0.246275	0.044697	0.0119489	0.0797857	0.126763	0	0.0306707	0.041053
Candidatus_Thiobios	0	0	0.0091227	0	0.0186258	0.0191559	0	0	0.0198067	0	0.0136314	0.00513163
Chromatiaceae/unclassified	0.00992999	0.0115806	0.0030409	0	0.0186258	0.0191559	0	0	0	0	0.0068157	0
Coxiella	0.0794399	0.167919	0.188536	0	0.206954	0.344806	0.0238977	0.0854847	0.023768	0.00555833	0.0102236	0.0359214
Aquicella	0	0.010133	0.0091227	0	0.00827815	0.0319264	0.0119489	0	0	0	0	0
EC3_ge	0.00992999	0.00289515	0.0060818	0	0.0144868	0	0	0	0	0	0	0
Raoultella	0	0	0.0091227	0	0	0.00638529	0	0	0	0	0.00340785	0
EPR3968-O8a-Bc78_ge	0.134055	0.00289515	0.112513	0	0.242136	0.581061	0.0238977	0	0	0	0.0443021	0
eub62A3_ge	0.0273075	0.00868546	0.030409	0	0.00827815	0	0.00597443	0.0227959	0.00792267	0	0	0
F9P41300-M23_ge	0	0.00434273	0	0	0.00206954	0	0	0	0	0.00555833	0	0
Francisella	0.004965	0.322809	0.0030409	0	0.0289735	0	0	0.0170969	0.0633814	0.00555833	0	0
Francisellaceae_ge	0.024825	0.0434273	0.0243272	0	0.026904	0.0255412	0	0.011398	0	0	0	0
Francisellaceae/unclassified	0.024825	0.085407	0.0334499	0	0.00827815	0.0127706	0	0.0284949	0.023768	0.0222333	0.0170393	0.0307898
Ga0077537_ge	0.014895	0	0.0121636	0	0.00620861	0.0766235	0.0238977	0	0.00396134	0.00555833	0.0374864	0
Candidatus_Berkiella	0.0124125	0.0665885	0.0121636	0	0.0517384	0.0127706	0	0	0	0	0	0
Marinicella	0.024825	0	0	0	0	0	0.0238977	0	0	0	0	0
Incertae_Sedis/uncultured	0.250732	0.0593506	0.243272	0	0.109685	0.478897	0.167284	0.0398929	0.0514974	0.0611417	0.276036	0.0307898
Wenzhouxiangella	0.00992999	0	0	0	0	0	0	0	0	0	0	0
HOC36_ge	0.111712	0.0130282	0.84537	0	0.399421	1.94113	0.0657187	0.011398	0.0198067	0.0722584	0.310115	0.0205265
JTB23_ge	0	0	0	0	0.0662252	0.0510823	0	0	0	0	0	0
KI89A_clade_ge	0.431955	0.0260564	0.358826	0	0.126242	0.600217	0.0955909	0.00569898	0.0158453	0.10005	0.296483	0.0513163
Legionella	0.00992999	0.00434273	0.0030409	0	0.00206954	0.00638529	0.0119489	0	0	0	0	0.00513163
Legionellaceae/unclassified	0.0273075	0.0217136	0.0060818	0	0.0186258	0.0127706	0.0119489	0	0.00792267	0	0	0.0102633
AqS1	0.0521325	0	0.0395317	0	0.113825	0.0766235	0	0	0	0	0.0068157	0
FS142-36B-02	0.0024825	0	0	0	0.0351821	0.0319264	0	0	0	0	0	0
Nitrosococcaceae/unclassified	0.0273075	0	0.106432	0	0.0517384	0.695996	0	0	0	0.00555833	0.0306707	0
NKB5_ge	0	0.00144758	0.0030409	0	0	0.00638529	0	0	0	0	0	0
Endozoicomonas	0.414577	1.99186	0.0395317	0.0575043	0.0248344	0.0255412	62.9824	57.4058	58.6753	79.2118	52.9682	56.0681
Oceanospirillum	0.0273075	0.00434273	0.0395317	0.172513	0.0827815	0	0	0.0170969	0.011884	0.0111167	0	0.00513163
Aliikangiella	0.0422025	0.0593506	0.091227	0	0.285596	0.0383117	0.0298721	0.0512908	0.0277294	0.050025	0.0272628	0.0667111
Amphritea	0.004965	0	0	0	0.00413907	0	0	0.00569898	0.011884	0.0111167	0	0
Motiliproteus	0.024825	0	0.0790634	0	0.0103477	0.0702382	0	0	0	0	0	0
Neptuniibacter	3.25207	1.19715	0.428767	3.79528	1.04719	2.90531	0.57952	1.28227	0.819997	0.2668	0.385087	0.210397
Nitrincolaceae/unclassified	0.769574	0.0405321	0.0334499	0	0.0331126	0.427814	0.0119489	0.0968827	0.0633814	0.0111167	0.0715649	0.0205265
Oleiphilus	0.270592	0.0998827	0.0182454	0	0.428394	0.102165	0.0298721	0.695276	0.0792267	0.00555833	0.0579335	0.0975009
Pseudohongiella	0.02979	0.0202661	0.0729816	0	0.0351821	0.044697	0.0119489	0	0	0.0389083	0.0306707	0
Reinekea	0.004965	0	0	0	0.136589	0.0255412	0	0.0797857	0.0198067	0.116725	0.0272628	0.0102633
Thalassolituus	0.804329	1.77328	0.732857	0.0575043	2.72765	0.472511	0.00597443	0.0683878	0.023768	0.00555833	0.00340785	0.0256581
Saccharospirillaceae/uncultured	0.0173775	0.00289515	0	0	0.0165563	0.00638529	0.0119489	0.0284949	0	0.0944917	0.0136314	0.0153949
Oceanospirillales/unclassified	0.0819224	1.4606	0.0760225	0	0.00620861	0.0510823	0	0	0	0	0	0
OM182_clade_ge	0.004965	0.00289515	0.0152045	0	0.00620861	0.0191559	0.0238977	0	0.00396134	0.016675	0.0204471	0
Acinetobacter	0.0024825	0.00144758	0.0121636	0	0	0	0	0	0.00792267	0.00555833	0	0
Enhydrobacter	0.0223425	0	1.7698	0	0.0331126	0.0191559	0	0	0	0.00555833	0	0
Pseudomonas	0.0521325	0.00868546	0.145963	0	0.026904	0.044697	0	0	0	0.0111167	0.00340785	0.0205265
JTB255_marine_benthic_group	0	0.00144758	0	0	0.122103	0.0383117	0	0	0	0	0	0
Woeseia	1.68065	0.128834	2.31108	0	0.800911	3.75455	0.334568	0.0455918	0.0514974	0.411317	1.09733	0.0564479
SZB50_ge	0.114195	0.0130282	0.0760225	0	0.0144868	0.178788	0	0.00569898	0	0.016675	0.102236	0
Candidatus_Tenderia	0	0	0.0030409	0	0.00620861	0.0127706	0	0	0	0	0.0170393	0
Thiohalorhabdaceae/uncultured	0.260662	0.0506652	0.818002	0	0.0620861	0.676841	0.0298721	0.0398929	0.0198067	0.1334	0.228326	0.0256581
Thiomicrospiraceae/endosymbionts	0	0	0	0	0.0455298	0	0	0	0	0	0	0
Thiotrichaceae/uncultured	0	0	0	0	0.0745033	0	0	0.011398	0.0158453	0	0.0068157	0.0307898
UBA10353_marine_group_ge	0.0322725	0	0.0395317	0	0.00206954	0.0574676	0.179233	0	0	0.0444667	0.0886041	0.0102633
Gammaproteobacteria/unclassified	21.707	32.6009	14.4868	0.747556	8.20571	18.9515	12.8868	19.0346	18.2261	6.41988	9.97819	19.4489
Gammaproteobacteria/uncultured	0.05958	0	0.109472	0	0.138659	0.55552	0.0238977	0	0	0.0389083	0.109051	0
Photobacterium	0.044685	0.00289515	0.349704	3.68028	0.0951987	0.0830087	0.0179233	0.00569898	0	0	0.0102236	0.00513163
Vibrionaceae/unclassified	0.0223425	0.00434273	0.571689	0.0575043	0.0558775	0.153247	0.47198	0.00569898	0.0316907	0.00555833	0.0170393	0.00513163
Vibrio	0.980587	0.151995	0.729816	64.6924	3.59685	0.625758	0.286773	0.387531	0.590239	0.855984	0.068157	0.241186
Rhodanobacteraceae/unclassified	0.230872	0.235955	0.690284	0	0.0289735	0.0766235	0	0	0	0	0	0
Xanthomonadaceae/unclassified	0	0	0.0699407	0	0	0	0	0	0	0	0	0
others	42.3787	30.7407	58.2758	12.1909	44.2881	52.8957	17.529	14.1962	15.168	9.17125	30.6059	19.5412
sum	100	100	100	100	100	100	100	100	100	100	100	100
