# Supplementary material for: Extra high superoxide dismutase in host tissue is associated with improving bleaching resistance in “thermal adapted” and Durusdinium trenchii-associating coral
Source: PeerJ. 2022 Jan 12;10:e12746. doi: 10.7717/peerj.12746 (PMC8760857; doi:10.7717/peerj.12746)
Supplement: Supplemental Information 13 [file peerj-10-12746-s013.xlsx]

## Sheet: worksheet
time (h)	temp (°C)	light (Lux)
0	30.255	236.8
0.0833	30.356	226
0.1667	30.457	226
0.25	30.457	236.8
0.3333	30.558	215.3
0.4167	30.659	215.3
0.5	30.76	226
0.5833	30.862	226
0.6667	30.862	215.3
0.75	30.963	226
0.8333	30.963	215.3
0.9167	30.963	236.8
1	30.963	236.8
1.0833	30.862	236.8
1.1667	30.862	226
1.25	30.963	236.8
1.3333	30.963	236.8
1.4167	30.963	215.3
1.5	30.963	204.5
1.5833	30.963	215.3
1.6667	31.064	215.3
1.75	31.064	215.3
1.8333	31.166	215.3
1.9167	31.166	226
2	31.166	226
2.0833	31.268	215.3
2.1667	31.268	226
2.25	31.268	236.8
2.3333	31.37	236.8
2.4167	31.37	226
2.5	31.37	226
2.5833	31.472	150.7
2.6667	31.472	139.9
2.75	31.472	139.9
2.8333	31.472	150.7
2.9167	31.472	150.7
3	31.37	150.7
3.0833	31.268	150.7
3.1667	31.268	150.7
3.25	31.166	150.7
3.3333	31.064	150.7
3.4167	31.064	150.7
3.5	30.963	150.7
3.5833	30.963	150.7
3.6667	30.862	139.9
3.75	30.76	161.5
3.8333	30.76	150.7
3.9167	30.659	150.7
4	30.659	150.7
4.0833	30.558	150.7
4.1667	30.558	150.7
4.25	30.457	150.7
4.3333	30.457	139.9
4.4167	30.457	150.7
4.5	30.558	150.7
4.5833	30.457	150.7
4.6667	30.457	150.7
4.75	30.457	150.7
4.8333	30.356	150.7
4.9167	30.356	150.7
5	30.255	0
5.0833	30.255	150.7
5.1667	30.255	150.7
5.25	30.255	150.7
5.3333	30.255	150.7
5.4167	30.154	150.7
5.5	30.154	150.7
5.5833	30.154	150.7
5.6667	30.054	150.7
5.75	30.054	150.7
5.8333	30.054	150.7
5.9167	29.953	139.9
6	29.953	150.7
6.0833	29.953	150.7
6.1667	29.853	150.7
6.25	29.853	150.7
6.3333	29.853	150.7
6.4167	29.853	150.7
6.5	29.752	150.7
6.5833	29.752	139.9
6.6667	29.652	150.7
6.75	29.652	150.7
6.8333	29.652	150.7
6.9167	29.652	139.9
7	29.652	150.7
7.0833	29.552	139.9
7.1667	29.552	150.7
7.25	29.552	150.7
7.3333	29.552	0
7.4167	29.552	0
7.5	29.552	0
7.5833	29.652	0
7.6667	29.652	0
7.75	29.752	0
7.8333	29.853	0
7.9167	29.953	0
8	30.054	0
8.0833	30.154	0
8.1667	30.255	193.8
8.25	30.356	193.8
8.3333	30.457	204.5
8.4167	30.558	204.5
8.5	30.659	204.5
8.5833	30.659	204.5
8.6667	30.76	226
8.75	30.76	193.8
8.8333	30.862	204.5
8.9167	30.862	226
9	30.862	215.3
9.0833	30.963	204.5
9.1667	30.963	193.8
9.25	30.963	215.3
9.3333	30.963	193.8
9.4167	30.963	193.8
9.5	30.963	204.5
9.5833	31.064	204.5
9.6667	31.064	215.3
9.75	31.064	204.5
9.8333	31.064	0
9.9167	31.064	0
10	31.064	0
10.0833	31.064	0
10.1667	31.064	0
10.25	31.064	0
10.3333	31.064	0
10.4167	31.064	0
10.5	31.064	0
10.5833	31.166	0
10.6667	31.166	0
10.75	31.166	0
10.8333	31.166	0
10.9167	31.166	0
11	31.166	0
11.0833	31.166	0
11.1667	31.166	0
11.25	31.166	0
11.3333	31.166	0
11.4167	31.166	0
11.5	31.166	0
11.5833	31.166	0
11.6667	31.166	0
11.75	31.166	0
11.8333	31.268	0
11.9167	31.166	0
12	31.268	0
12.0833	31.268	0
12.1667	31.268	0
12.25	31.268	0
12.3333	31.268	0
12.4167	31.268	0
12.5	31.268	0
12.5833	31.268	0
12.6667	31.268	0
12.75	31.268	0
12.8333	31.268	0
12.9167	31.268	0
13	31.268	0
13.0833	31.268	0
13.1667	31.268	0
13.25	31.268	0
13.3333	31.268	0
13.4167	31.268	0
13.5	31.268	0
13.5833	31.268	0
13.6667	31.268	0
13.75	31.268	0
13.8333	31.268	0
13.9167	31.268	0
14	31.37	0
14.0833	31.37	0
14.1667	31.37	0
14.25	31.37	0
14.3333	31.37	0
14.4167	31.37	0
14.5	31.37	0
14.5833	31.472	0
14.6667	31.37	0
14.75	31.472	0
14.8333	31.472	0
14.9167	31.472	0
15	31.472	0
15.0833	31.472	0
15.1667	31.472	0
15.25	31.472	0
15.3333	31.472	0
15.4167	31.472	0
15.5	31.472	0
15.5833	31.472	0
15.6667	31.472	0
15.75	31.472	0
15.8333	31.472	0
15.9167	31.472	0
16	31.472	0
16.0833	31.472	0
16.1667	31.472	0
16.25	31.472	0
16.3333	31.472	0
16.4167	31.472	0
16.5	31.472	0
16.5833	31.472	0
16.6667	31.574	0
16.75	31.574	0
16.8333	31.574	0
16.9167	31.574	0
17	31.574	0
17.0833	31.574	0
17.1667	31.574	0
17.25	31.574	0
17.3333	31.574	0
17.4167	31.574	0
17.5	31.574	0
17.5833	31.676	0
17.6667	31.676	0
17.75	31.676	0
17.8333	31.676	0
17.9167	31.676	0
18	31.676	0
18.0833	31.676	0
18.1667	31.676	0
18.25	31.676	0
18.3333	31.676	0
18.4167	31.676	0
18.5	31.676	0
18.5833	31.676	0
18.6667	31.778	0
18.75	31.676	0
18.8333	31.778	0
18.9167	31.676	0
19	31.778	0
19.0833	31.778	0
19.1667	31.778	0
19.25	31.778	0
19.3333	31.778	0
19.4167	31.778	0
19.5	31.778	0
19.5833	31.778	0
19.6667	31.778	0
19.75	31.778	0
19.8333	31.778	0
19.9167	31.778	0
20	31.778	0
20.0833	31.778	0
20.1667	31.778	0
20.25	31.88	0
20.3333	31.778	0
20.4167	31.88	0
20.5	31.88	0
20.5833	31.88	0
20.6667	31.88	0
20.75	31.88	215.3
20.8333	31.88	215.3
20.9167	31.983	236.8
21	31.983	215.3
21.0833	31.983	215.3
21.1667	31.983	226
21.25	31.983	215.3
21.3333	31.983	215.3
21.4167	31.574	226
21.5	30.76	226
21.5833	30.054	226
21.6667	29.552	215.3
21.75	29.552	215.3
21.8333	29.752	226
21.9167	29.953	204.5
22	30.054	215.3
22.0833	30.255	204.5
22.1667	30.356	226
22.25	30.558	204.5
22.3333	30.659	226
22.4167	30.76	226
22.5	30.862	215.3
22.5833	30.963	226
22.6667	30.963	226
22.75	31.064	226
22.8333	31.064	215.3
22.9167	31.064	226
23	31.166	226
23.0833	31.166	204.5
23.1667	31.166	226
23.25	31.268	215.3
23.3333	31.268	215.3
23.4167	31.268	215.3
23.5	31.37	226
23.5833	31.37	204.5
23.6667	31.472	215.3
23.75	31.472	215.3
23.8333	31.472	0
23.9167	31.472	0
24	31.472	0
24.0833	31.472	0
24.1667	31.37	0
24.25	31.268	0
24.3333	31.268	0
24.4167	31.064	0
24.5	30.963	0
24.5833	30.862	0
24.6667	30.963	0
24.75	31.064	236.8
24.8333	31.064	247.6
24.9167	31.064	269.1
25	30.963	269.1
25.0833	30.862	247.6
25.1667	30.862	247.6
25.25	30.76	269.1
25.3333	30.76	279.9
25.4167	30.659	290.6
25.5	30.659	279.9
25.5833	30.659	279.9
25.6667	30.659	279.9
25.75	30.659	279.9
25.8333	30.659	269.1
25.9167	30.659	290.6
26	30.558	290.6
26.0833	30.558	269.1
26.1667	30.558	290.6
26.25	30.558	279.9
26.3333	30.558	290.6
26.4167	30.457	290.6
26.5	30.457	290.6
26.5833	30.457	279.9
26.6667	30.457	301.4
26.75	30.457	290.6
26.8333	30.356	290.6
26.9167	30.356	301.4
27	30.356	279.9
27.0833	30.255	301.4
27.1667	30.255	290.6
27.25	30.255	301.4
27.3333	30.255	279.9
27.4167	30.154	290.6
27.5	30.154	290.6
27.5833	30.154	290.6
27.6667	30.255	290.6
27.75	30.255	301.4
27.8333	30.255	290.6
27.9167	30.255	301.4
28	30.255	290.6
28.0833	30.255	290.6
28.1667	30.255	290.6
28.25	30.255	279.9
28.3333	30.154	290.6
28.4167	30.154	290.6
28.5	30.054	290.6
28.5833	30.054	279.9
28.6667	30.054	301.4
28.75	29.953	279.9
28.8333	29.953	279.9
28.9167	29.953	290.6
29	29.853	290.6
29.0833	29.853	279.9
29.1667	29.752	279.9
29.25	29.752	290.6
29.3333	29.752	290.6
29.4167	29.652	301.4
29.5	29.652	290.6
29.5833	29.652	279.9
29.6667	29.552	290.6
29.75	29.552	279.9
29.8333	29.552	279.9
29.9167	29.552	290.6
30	29.452	290.6
30.0833	29.452	290.6
30.1667	29.452	279.9
30.25	29.452	279.9
30.3333	29.352	258.3
30.4167	29.352	279.9
30.5	29.352	290.6
30.5833	29.352	290.6
30.6667	29.252	279.9
30.75	29.252	269.1
30.8333	29.252	279.9
30.9167	29.252	279.9
31	29.252	279.9
31.0833	29.152	279.9
31.1667	29.152	279.9
31.25	29.152	269.1
31.3333	29.053	279.9
31.4167	29.053	0
31.5	29.053	0
31.5833	29.152	0
31.6667	29.152	0
31.75	29.252	0
31.8333	29.352	0
31.9167	29.552	0
32	29.652	0
32.0833	29.752	236.8
32.1667	29.853	236.8
32.25	29.953	226
32.3333	30.054	226
32.4167	30.154	236.8
32.5	30.356	215.3
32.5833	30.457	226
32.6667	30.457	226
32.75	30.558	215.3
32.8333	30.659	215.3
32.9167	30.659	226
33	30.659	226
33.0833	30.76	215.3
33.1667	30.862	215.3
33.25	30.862	226
33.3333	30.963	226
33.4167	30.963	215.3
33.5	30.963	226
33.5833	30.963	215.3
33.6667	31.064	215.3
33.75	31.064	226
33.8333	31.064	215.3
33.9167	31.064	0
34	31.064	0
34.0833	31.064	0
34.1667	31.064	0
34.25	31.064	0
34.3333	31.064	0
34.4167	31.064	0
34.5	31.064	0
34.5833	31.064	0
34.6667	31.166	0
34.75	31.166	0
34.8333	31.166	0
34.9167	31.166	0
35	31.166	0
35.0833	31.166	0
35.1667	31.166	0
35.25	31.166	0
35.3333	31.166	0
35.4167	31.166	0
35.5	31.166	0
35.5833	31.166	0
35.6667	31.268	0
35.75	31.166	0
35.8333	31.268	0
35.9167	31.268	0
36	31.268	0
36.0833	31.268	0
36.1667	31.268	0
36.25	31.268	0
36.3333	31.268	0
36.4167	31.268	0
36.5	31.268	0
36.5833	31.268	0
36.6667	31.268	0
36.75	31.268	0
36.8333	31.268	0
36.9167	31.268	0
37	31.268	0
37.0833	31.268	0
37.1667	31.268	0
37.25	31.268	0
37.3333	31.268	0
37.4167	31.268	0
37.5	31.268	0
37.5833	31.268	0
37.6667	31.268	0
37.75	31.268	0
37.8333	31.268	0
37.9167	31.268	0
38	31.268	0
38.0833	31.37	0
38.1667	31.37	0
38.25	31.37	0
38.3333	31.37	0
38.4167	31.37	0
38.5	31.37	0
38.5833	31.37	0
38.6667	31.37	0
38.75	31.472	0
38.8333	31.37	0
38.9167	31.472	0
39	31.472	0
39.0833	31.472	0
39.1667	31.472	0
39.25	31.472	0
39.3333	31.472	0
39.4167	31.472	0
39.5	31.472	0
39.5833	31.472	0
39.6667	31.472	0
39.75	31.472	0
39.8333	31.472	0
39.9167	31.472	0
40	31.472	0
40.0833	31.472	0
40.1667	31.472	0
40.25	31.472	0
40.3333	31.472	0
40.4167	31.472	0
40.5	31.574	0
40.5833	31.574	0
40.6667	31.574	0
40.75	31.574	0
40.8333	31.574	0
40.9167	31.574	0
41	31.574	0
41.0833	31.574	0
41.1667	31.574	0
41.25	31.574	0
41.3333	31.574	0
41.4167	31.574	0
41.5	31.574	0
41.5833	31.574	0
41.6667	31.676	0
41.75	31.676	0
41.8333	31.676	0
41.9167	31.676	0
42	31.676	0
42.0833	31.676	0
42.1667	31.676	0
42.25	31.676	0
42.3333	31.676	0
42.4167	31.778	0
42.5	31.778	0
42.5833	31.778	0
42.6667	31.778	0
42.75	31.778	0
42.8333	31.778	0
42.9167	31.778	0
43	31.778	0
43.0833	31.778	0
43.1667	31.778	0
43.25	31.778	0
43.3333	31.778	0
43.4167	31.778	0
43.5	31.778	0
43.5833	31.778	0
43.6667	31.778	0
43.75	31.778	0
43.8333	31.778	0
43.9167	31.778	0
44	31.778	0
44.0833	31.778	0
44.1667	31.778	0
44.25	31.778	0
44.3333	31.778	0
44.4167	31.778	0
44.5	31.778	0
44.5833	31.778	0
44.6667	31.88	0
44.75	31.88	226
44.8333	31.88	236.8
44.9167	31.88	236.8
45	31.88	226
45.0833	31.88	215.3
45.1667	31.88	226
45.25	31.983	215.3
45.3333	31.983	215.3
45.4167	31.983	226
45.5	31.983	215.3
45.5833	31.983	215.3
45.6667	31.574	226
45.75	30.76	226
45.8333	30.154	215.3
45.9167	29.853	204.5
46	30.054	215.3
46.0833	30.154	215.3
46.1667	30.356	215.3
46.25	30.457	226
46.3333	30.659	215.3
46.4167	30.76	226
46.5	30.76	226
46.5833	30.862	226
46.6667	30.963	215.3
46.75	31.064	215.3
46.8333	31.064	226
46.9167	31.064	226
47	31.166	215.3
47.0833	31.166	215.3
47.1667	31.268	226
47.25	31.268	226
47.3333	31.268	226
47.4167	31.37	215.3
47.5	31.37	215.3
47.5833	31.472	215.3
47.6667	31.472	236.8
47.75	31.472	215.3
47.8333	31.574	0
47.9167	31.574	0
48	31.472	0
48.0833	31.472	0
48.1667	31.37	0
48.25	31.37	0
48.3333	31.268	0
48.4167	31.166	0
48.5	31.166	269.1
48.5833	31.064	269.1
48.6667	30.963	269.1
48.75	30.862	247.6
48.8333	30.862	258.3
48.9167	30.862	269.1
49	30.76	247.6
49.0833	30.76	279.9
49.1667	30.76	258.3
49.25	30.76	258.3
49.3333	30.659	269.1
49.4167	30.659	269.1
49.5	30.659	247.6
49.5833	30.659	258.3
49.6667	30.659	258.3
49.75	30.558	279.9
49.8333	30.659	269.1
49.9167	30.659	269.1
50	30.659	279.9
50.0833	30.558	269.1
50.1667	30.659	247.6
50.25	30.659	236.8
50.3333	30.558	269.1
50.4167	30.558	236.8
50.5	30.558	247.6
50.5833	30.659	258.3
50.6667	30.659	269.1
50.75	30.558	258.3
50.8333	30.558	247.6
50.9167	30.558	269.1
51	30.659	236.8
51.0833	30.558	269.1
51.1667	30.558	258.3
51.25	30.457	258.3
51.3333	30.558	247.6
51.4167	30.558	279.9
51.5	30.558	269.1
51.5833	30.457	269.1
51.6667	30.457	258.3
51.75	30.457	279.9
51.8333	30.558	247.6
51.9167	30.558	269.1
52	30.558	258.3
52.0833	30.659	258.3
52.1667	30.659	269.1
52.25	30.659	258.3
52.3333	30.659	247.6
52.4167	30.659	258.3
52.5	30.659	258.3
52.5833	30.659	269.1
52.6667	30.659	258.3
52.75	30.558	290.6
52.8333	30.457	269.1
52.9167	30.558	258.3
53	30.457	247.6
53.0833	30.457	258.3
53.1667	30.558	269.1
53.25	30.457	258.3
53.3333	30.457	258.3
53.4167	30.457	269.1
53.5	30.457	279.9
53.5833	30.457	279.9
53.6667	30.356	258.3
53.75	30.356	247.6
53.8333	30.457	290.6
53.9167	30.457	258.3
54	30.457	269.1
54.0833	30.457	258.3
54.1667	30.356	279.9
54.25	30.356	258.3
54.3333	30.356	247.6
54.4167	30.356	258.3
54.5	30.356	269.1
54.5833	30.356	247.6
54.6667	30.356	269.1
54.75	30.356	258.3
54.8333	30.356	279.9
54.9167	30.356	258.3
55	30.255	258.3
55.0833	30.255	247.6
55.1667	30.255	258.3
55.25	30.356	269.1
55.3333	30.255	258.3
55.4167	30.255	236.8
55.5	30.255	247.6
55.5833	30.356	258.3
55.6667	30.457	247.6
55.75	30.457	247.6
55.8333	30.558	247.6
55.9167	30.558	258.3
56	30.659	258.3
56.0833	30.659	236.8
56.1667	30.659	236.8
56.25	30.76	247.6
56.3333	30.862	236.8
56.4167	30.862	258.3
56.5	30.963	226
56.5833	30.963	247.6
56.6667	30.963	247.6
56.75	30.963	226
56.8333	30.963	226
56.9167	31.064	226
57	31.064	258.3
57.0833	31.166	226
57.1667	31.166	236.8
57.25	31.166	247.6
57.3333	31.166	226
57.4167	31.166	236.8
57.5	31.166	236.8
57.5833	31.268	226
57.6667	31.268	215.3
57.75	31.268	247.6
57.8333	31.268	0
57.9167	31.268	0
58	31.268	0
58.0833	31.268	0
58.1667	31.37	0
58.25	31.37	0
58.3333	31.37	0
58.4167	31.37	0
58.5	31.37	0
58.5833	31.37	0
58.6667	31.37	0
58.75	31.37	0
58.8333	31.472	0
58.9167	31.472	0
59	31.472	0
59.0833	31.472	0
59.1667	31.472	0
59.25	31.472	0
59.3333	31.472	0
59.4167	31.472	0
59.5	31.472	0
59.5833	31.472	0
59.6667	31.472	0
59.75	31.472	0
59.8333	31.472	0
59.9167	31.472	0
60	31.472	0
60.0833	31.472	0
60.1667	31.472	0
60.25	31.472	0
60.3333	31.472	0
60.4167	31.472	0
60.5	31.574	0
60.5833	31.574	0
60.6667	31.574	0
60.75	31.574	0
60.8333	31.574	0
60.9167	31.574	0
61	31.574	0
61.0833	31.574	0
61.1667	31.574	0
61.25	31.574	0
61.3333	31.676	0
61.4167	31.676	0
61.5	31.676	0
61.5833	31.676	0
61.6667	31.676	0
61.75	31.676	0
61.8333	31.676	0
61.9167	31.676	0
62	31.676	0
62.0833	31.676	0
62.1667	31.676	0
62.25	31.676	0
62.3333	31.676	0
62.4167	31.778	0
62.5	31.778	0
62.5833	31.778	0
62.6667	31.778	0
62.75	31.778	0
62.8333	31.778	0
62.9167	31.778	0
63	31.778	0
63.0833	31.778	0
63.1667	31.778	0
63.25	31.778	0
63.3333	31.778	0
63.4167	31.778	0
63.5	31.778	0
63.5833	31.778	0
63.6667	31.778	0
63.75	31.778	0
63.8333	31.778	0
63.9167	31.778	0
64	31.778	0
64.0833	31.778	0
64.1667	31.88	0
64.25	31.778	0
64.3333	31.778	0
64.4167	31.88	0
64.5	31.88	0
64.5833	31.88	0
64.6667	31.88	0
64.75	31.88	0
64.8333	31.88	0
64.9167	31.88	0
65	31.88	0
65.0833	31.88	0
65.1667	31.676	0
65.25	30.963	0
65.3333	30.356	0
65.4167	29.853	0
65.5	29.953	0
65.5833	30.154	0
65.6667	30.255	0
65.75	30.457	0
65.8333	30.457	0
65.9167	30.659	0
66	30.659	0
66.0833	30.76	0
66.1667	30.862	0
66.25	30.862	0
66.3333	30.963	0
66.4167	30.963	0
66.5	31.064	0
66.5833	31.064	0
66.6667	31.064	0
66.75	31.064	0
66.8333	31.166	0
66.9167	31.166	0
67	31.166	0
67.0833	31.166	0
67.1667	31.268	0
67.25	31.268	0
67.3333	31.268	0
67.4167	31.268	0
67.5	31.268	0
67.5833	31.268	0
67.6667	31.268	0
67.75	31.37	0
67.8333	31.37	0
67.9167	31.37	0
68	31.37	0
68.0833	31.37	0
68.1667	31.472	0
68.25	31.472	0
68.3333	31.472	0
68.4167	31.472	0
68.5	31.472	0
68.5833	31.574	0
68.6667	31.574	236.8
68.75	31.574	236.8
68.8333	31.574	247.6
68.9167	31.676	247.6
69	31.676	226
69.0833	31.676	247.6
69.1667	31.778	236.8
69.25	31.778	258.3
69.3333	31.778	258.3
69.4167	31.88	247.6
69.5	31.88	236.8
69.5833	31.88	236.8
69.6667	31.88	236.8
69.75	31.88	236.8
69.8333	31.983	258.3
69.9167	31.472	226
70	30.76	247.6
70.0833	30.255	247.6
70.1667	29.752	236.8
70.25	29.853	236.8
70.3333	30.054	236.8
70.4167	30.154	247.6
70.5	30.457	236.8
70.5833	30.659	247.6
70.6667	30.659	226
70.75	30.76	247.6
70.8333	30.76	247.6
70.9167	30.862	247.6
71	30.963	236.8
71.0833	31.064	236.8
71.1667	31.064	258.3
71.25	31.166	236.8
71.3333	31.166	236.8
71.4167	31.268	236.8
71.5	31.268	258.3
71.5833	31.37	258.3
71.6667	31.472	258.3
71.75	31.472	236.8
71.8333	31.472	258.3
71.9167	31.574	236.8
72	31.574	247.6
72.0833	31.574	0
72.1667	31.37	64.6
