# Supplementary material for: Extra high superoxide dismutase in host tissue is associated with improving bleaching resistance in “thermal adapted” and Durusdinium trenchii-associating coral
Source: PeerJ. 2022 Jan 12;10:e12746. doi: 10.7717/peerj.12746 (PMC8760857; doi:10.7717/peerj.12746)
Supplement: Supplemental Information 14 [file peerj-10-12746-s014.xlsx]

## Sheet: all data
		Relative percentage composition (%)
		Isopora palifera			Platygyra verweyi			IP mean	sd	PV mean	sd
		1	2	3	1	2	3					PC1
saturated	C10:0	3.38	4.15	2.54	2.03	4.05	4.97	3.35667	0.805254	3.68333	1.50391	-0.056	C10:0
	C12:0	0.99	1.18	2.09	1.4	1.81	2.41	1.42	0.587963	1.87333	0.50797	-0.029	C12:0
	C14:0	19.68	16.85	11.22	9.22	14.72	27.75	15.9167	4.30653	17.23	9.51658	-0.316	C14:0	42.0033	48.23		45.27	41.35	39.39	2.99395
	C15:0	1.31	1.15	0.98	1.47	1.2	2.88	1.14667	0.165025	1.85	0.902164	-0.054	C15:0				45.12	48.03	51.54	3.21467
	C16:0	25.59	24.5	28.17	21.63	17.91	11.33	26.0867	1.88474	16.9567	5.21576	0.595	C16:0
	C17:0	1.49	0.12	0.14	0.91	1.19	0.76	0.583333	0.78526	0.953333	0.218251	-0.02	C17:0
	C18:0	4.19	7.21	7.33	11	9.09	7.52	6.24333	1.77925	9.20333	1.74277	-0.102	C18:0
	C20:0	2.42	0.72	1.01	1.09	1.44	1.26	1.38333	0.909414	1.26333	0.175024	0.002	C20:0
	C22:0	2.83	3.38	3.06	14.27	15.4	12.46	3.09	0.276225	14.0433	1.48305	-0.531	C22:0
	C24:0	3.32	3.44	4.6	5.39	3.53	2.62	3.78667	0.706918	3.84667	1.41189	0.034	C24:0
mono-unsaturated	C14:1	1.77	1.42	0.77	1.31	1.19	1.25	1.32	0.507445	1.25	0.06	-0.001	C14:1
	C15:1	0.13	0.09	0.09	0.23	0.16	0.11	0.103333	0.023094	0.166667	0.0602771	-0.002	C15:1
	C16:1	0.54	0.53	0.66	0.55	0.52	0.61	0.576667	0.0723418	0.56	0.0458258	0.001	C16:1
	C17:1	0.13	0	0	0.14	0.2	0.11	0.0433333	0.0750555	0.15	0.0458258	-0.005	C17:1
	C18:1	6.34	8.14	7.63	7.62	8.18	7.49	7.37	0.927739	7.76333	0.366652	-0.016	C18:1
	C20:1	0.17	0.87	0.79	0.91	0.8	0.79	0.61	0.383145	0.833333	0.0665833	-0.009	C20:1
	C22:1	7.43	9.49	8.84	1.51	1.48	1.24	8.58667	1.05311	1.41	0.147986	0.367	C22:1
	C24:1	1.83	2.93	3.29	0.61	0.74	0.81	2.68333	0.760614	0.72	0.101489	0.102	C24:1
poly-unsaturated	C18:2	6.18	1.86	2.64	0.57	0.54	0.83	3.56	2.30226	0.646667	0.159478	0.137	C18:2
	C20:2	0.2	1.02	1.12	0.53	0.4	0.29	0.78	0.504777	0.406667	0.120139	0.024	C20:2
	C24:2	0.33	1.5	1.34	0.85	1.46	0.9	1.05667	0.634376	1.07	0.338674	0.002	C24:2
	C18:3	3.37	3.54	5.17	3.61	1.83	0.69	4.02667	0.993797	2.04333	1.47164	0.142	C18:3
	C20:5	3.71	4.26	4.33	9.61	9.81	8.34	4.1	0.339559	9.25333	0.797266	-0.243	C20:5
	C22:6	2.65	1.66	2.18	3.54	2.37	2.56	2.16333	0.49521	2.82333	0.62788	-0.023	C22:6
	saturated	65.2	62.7	61.15	68.41	70.34	73.97	63.0167	2.04349	70.9067	2.82298
	mono-unsaturated	18.35	23.47	22.07	12.88	13.25	12.42	21.2967	2.64615	12.85	0.415812
	poly-insaturated	16.45	13.83	16.78	18.71	16.4	13.62	15.6867	1.61636	16.2433	2.54861

## Sheet: PCA analysis
	Ip-1	Ip-2	Ip-3	Pv-1	Pv-2	Pv-3
C10:0	3.38	4.15	2.54	2.03	4.05	4.97
C12:0	0.99	1.18	2.09	1.4	1.81	2.41
C14:0	19.68	16.85	11.22	9.22	14.72	27.75
C15:0	1.31	1.15	0.98	1.47	1.2	2.88
C16:0	25.59	24.5	28.17	21.63	17.91	11.33
C17:0	1.49	0.12	0.14	0.91	1.19	0.76
C18:0	4.19	7.21	7.33	11	9.09	7.52
C20:0	2.42	0.72	1.01	1.09	1.44	1.26
C22:0	2.83	3.38	3.06	14.27	15.4	12.46
C24:0	3.32	3.44	4.6	5.39	3.53	2.62
C14:1	1.77	1.42	0.77	1.31	1.19	1.25
C15:1	0.13	0.09	0.09	0.23	0.16	0.11
C16:1	0.54	0.53	0.66	0.55	0.52	0.61
C17:1	0.13	0	0	0.14	0.2	0.11
C18:1	6.34	8.14	7.63	7.62	8.18	7.49
C20:1	0.17	0.87	0.79	0.91	0.8	0.79
C22:1	7.43	9.49	8.84	1.51	1.48	1.24
C24:1	1.83	2.93	3.29	0.61	0.74	0.81
C18:2	6.18	1.86	2.64	0.57	0.54	0.83
C20:2	0.2	1.02	1.12	0.53	0.4	0.29
C24:2	0.33	1.5	1.34	0.85	1.46	0.9
C18:3	3.37	3.54	5.17	3.61	1.83	0.69
C20:5	3.71	4.26	4.33	9.61	9.81	8.34
C22:6	2.65	1.66	2.18	3.54	2.37	2.56
								Eigenvalues
								PC	Eigenvalues	%Variation	Cum.%Variation
								1	100	62.1	62.1				Eigenvectors
								2	54.7	33.9	96				Variable	PC1	PC2	PC3
								3	4.96	3.1	99.1				C10:0	-0.056	0.105	-0.143
															C12:0	-0.029	0.005	-0.098
															C14:0	-0.316	0.79	0.029
															C15:0	-0.054	0.045	-0.013
															C16:0	0.595	-0.167	0.249
															C17:0	-0.02	0.001	0.222
															C18:0	-0.102	-0.25	-0.308
															C20:0	0.002	0.027	0.243
															C22:0	-0.531	-0.393	0.157
															C24:0	0.034	-0.116	0.026
															C14:1	-0.001	0.017	0.082
															C15:1	-0.002	-0.005	0.011
															C16:1	0.001	0.001	-0.007
															C17:1	-0.005	-0.003	0.023
															C18:1	-0.016	-0.04	-0.241
															C20:1	-0.009	-0.019	-0.097
															C22:1	0.367	0.171	-0.378
															C24:1	0.102	0.039	-0.219
															C18:2	0.137	0.143	0.58
															C20:2	0.024	-0.012	-0.127
															C24:2	0.002	-0.019	-0.171
															C18:3	0.142	-0.075	-0.024
															C20:5	-0.243	-0.206	0.033
															C22:6	-0.023	-0.04	0.169

## Sheet: 14-22 sat vs unsat
													mean	sd
	C14:0	C14:1		mean	sd		T value	0.295993				PV	13.8693	7.69135
IP	19.68	1.77	11.1186	12.5188	1.81654		P value	0.781966				PV	13.3577	11.1198
IP	16.85	1.42	11.8662				Degrees of Freedom	4				PV	30.7811	10.8504
IP	11.22	0.77	14.5714									PV	0.876148	0.0503856
PV	9.22	1.31	7.03817	13.8693	7.69135							PV	0.121064	0.0194738
PV	14.72	1.19	12.3697									PV	3.36823	0.592198
PV	27.75	1.25	22.2									PV	2.27616	1.22649
												PV
	C15:0	C15:1		mean	sd							PV
IP	1.31	0.13	10.0769	11.2479	1.38575		T value	0.326112
IP	1.15	0.09	12.7778				P value	0.760688
IP	0.98	0.09	10.8889				Degrees of Freedom	4
PV	1.47	0.23	6.3913	13.3577	11.1198
PV	1.2	0.16	7.5
PV	2.88	0.11	26.1818
			sat/unsat				T value	-2.28127
	C16:0	C16:1		mean	sd		P value	0.0846679
IP	25.59	0.54	47.3889	45.4324	2.45194		Degrees of Freedom	4
IP	24.5	0.53	46.2264
IP	28.17	0.66	42.6818
PV	21.63	0.55	39.3273	30.7811	10.8504
PV	17.91	0.52	34.4423
PV	11.33	0.61	18.5738
					sat/unsat
	C18:0	C18:1	C18:2	C18:3		mean	sd		T value	5.21796
IP	4.19	6.34	6.18	3.37	0.263688	0.423642	0.141502		P value	0.00643646
IP	7.21	8.14	1.86	3.54	0.532496				Degrees of Freedom	4
IP	7.33	7.63	2.64	5.17	0.474741
PV	11	7.62	0.57	3.61	0.932203	0.876148	0.0503856
PV	9.09	8.18	0.54	1.83	0.861611
PV	7.52	7.49	0.83	0.69	0.834628
					sat/unsat
	C20:0	C20:1	C20:2	C20:5		mean	sd		T value	-1.11456
IP	2.42	0.17	0.2	3.71	0.593137	0.29069	0.262883		P value	0.327487
IP	0.72	0.87	1.02	4.26	0.117073				Degrees of Freedom	4
IP	1.01	0.79	1.12	4.33	0.161859
PV	1.09	0.91	0.53	9.61	0.0986425	0.121064	0.0194738
PV	1.44	0.8	0.4	9.81	0.13079
PV	1.26	0.79	0.29	8.34	0.133758
					sat/unsat
	C22:0	C22:1	C22:6			mean	sd		T value	9.00889
IP	2.83	7.43	2.65		0.280754	0.28719	0.0138977		P value	0.000840637
IP	3.38	9.49	1.66		0.303139				Degrees of Freedom	4
IP	3.06	8.84	2.18		0.277677
PV	14.27	1.51	3.54		2.82574	3.36823	0.592198
PV	15.4	1.48	2.37		4
PV	12.46	1.24	2.56		3.27895
				sat/unsat
	C24:0	C24:1	C24:2		mean	sd
IP	3.32	1.83	0.33	1.53704	1.10236	0.391765			T value	1.57904
IP	3.44	2.93	1.5	0.776524					P value	0.189471
IP	4.6	3.29	1.34	0.993521					Degrees of Freedom	4
PV	5.39	0.61	0.85	3.69178	2.27616	1.22649
PV	3.53	0.74	1.46	1.60455
PV	2.62	0.81	0.9	1.53216
	mean	sd
IP	12.5188	1.81654
IP	11.2479	1.38575
IP	45.4324	2.45194
IP	0.423642	0.141502
IP	0.29069	0.262883
IP	0.28719	0.0138977
IP	1.10236	0.391765

## Sheet: sat vs unsat
	Relative percentage composition (%)									saturated	mono-unsaturated	poly-insaturated	saturated	mono-unsaturated	poly-unsaturated
	Isopora palifera			Platygyra verweyi						65.2	18.35	16.45	68.41	12.88	18.71
	1	2	3	1	2	3				62.7	23.47	13.83	70.34	13.25	16.4
saturated	65.2	62.7	61.15	68.41	70.34	73.97				61.15	22.07	16.78	73.97	12.42	13.62
mono-unsaturated	18.35	23.47	22.07	12.88	13.25	12.42
poly-insaturated	16.45	13.83	16.78	18.71	16.4	13.62			mean	63.0167	21.2967	15.6867	70.9067	12.85	16.2433
									sd	2.04349	2.64615	1.61636	2.82298	0.415812	2.54861
	saturated		mono-unsaturated			poly-unsaturated
P. verweyi
I. palifera

## Sheet: degree of unsat
	C10:0	C12:0	C14:0	C14:1	C15:0	C15:1	C16:0	C16:1	C17:0	C17:1	C18:0	C18:1	C18:2	C20:0	C18:3	C20:1	C20:2	C22:0	C22:1	C24:0	C20:5	C24:1	C24:2	C22:6
IP	3.38	0.99	19.68	1.77	1.31	0.13	25.59	0.54	1.49	0.13	4.19	6.34	6.18	2.42	3.37	0.17	0.2	2.83	7.43	3.32	3.71	1.83	0.33	2.65
IP	4.15	1.18	16.85	1.42	1.15	0.09	24.5	0.53	0.12	0	7.21	8.14	1.86	0.72	3.54	0.87	1.02	3.38	9.49	3.44	4.26	2.93	1.5	1.66
IP	2.54	2.09	11.22	0.77	0.98	0.09	28.17	0.66	0.14	0	7.33	7.63	2.64	1.01	5.17	0.79	1.12	3.06	8.84	4.6	4.33	3.29	1.34	2.18
PV	2.03	1.4	9.22	1.31	1.47	0.23	21.63	0.55	0.91	0.14	11	7.62	0.57	1.09	3.61	0.91	0.53	14.27	1.51	5.39	9.61	0.61	0.85	3.54
PV	4.05	1.81	14.72	1.19	1.2	0.16	17.91	0.52	1.19	0.2	9.09	8.18	0.54	1.44	1.83	0.8	0.4	15.4	1.48	3.53	9.81	0.74	1.46	2.37
PV	4.97	2.41	27.75	1.25	2.88	0.11	11.33	0.61	0.76	0.11	7.52	7.49	0.83	1.26	0.69	0.79	0.29	12.46	1.24	2.62	8.34	0.81	0.9	2.56
	C10:0	C12:0	C14:0	C15:0	C16:0	C17:0	C18:0	C20:0	C22:0	C24:0	C14:1	C15:1	C16:1	C17:1	C18:1	C20:1	C22:1	C24:1	C18:2	C20:2	C24:2	C18:3	C20:5	C22:6
IP	3.38	0.99	19.68	1.31	25.59	1.49	4.19	2.42	2.83	3.32	1.77	0.13	0.54	0.13	6.34	0.17	7.43	1.83	6.18	0.2	0.33	3.37	3.71	2.65
IP	4.15	1.18	16.85	1.15	24.5	0.12	7.21	0.72	3.38	3.44	1.42	0.09	0.53	0	8.14	0.87	9.49	2.93	1.86	1.02	1.5	3.54	4.26	1.66
IP	2.54	2.09	11.22	0.98	28.17	0.14	7.33	1.01	3.06	4.6	0.77	0.09	0.66	0	7.63	0.79	8.84	3.29	2.64	1.12	1.34	5.17	4.33	2.18
PV	2.03	1.4	9.22	1.47	21.63	0.91	11	1.09	14.27	5.39	1.31	0.23	0.55	0.14	7.62	0.91	1.51	0.61	0.57	0.53	0.85	3.61	9.61	3.54
PV	4.05	1.81	14.72	1.2	17.91	1.19	9.09	1.44	15.4	3.53	1.19	0.16	0.52	0.2	8.18	0.8	1.48	0.74	0.54	0.4	1.46	1.83	9.81	2.37
PV	4.97	2.41	27.75	2.88	11.33	0.76	7.52	1.26	12.46	2.62	1.25	0.11	0.61	0.11	7.49	0.79	1.24	0.81	0.83	0.29	0.9	0.69	8.34	2.56
										IP	18.34								6.71			3.37	3.71	2.65
										IP	23.47								4.38
										IP	22.07								5.1
										PV	12.88								1.95
										PV	13.27								2.4
										PV	12.41								2.02
	u-1	u-2	u-3	u-5	u-6		unsat nindex
IP	18.34	6.71	3.37	3.71	2.65		0.7632
IP	23.47	4.38	3.54	4.26	1.66		0.7411
IP	22.07	5.1	5.17	4.33	2.18		0.8251
PV	12.88	1.95	3.61	9.61	3.54		0.969
PV	13.27	2.4	1.83	9.81	2.37		0.8683
PV	12.41	2.02	0.69	8.34	2.56		0.7558
							T value	-1.32158
							P value	0.256826
							Degrees of Freedom	4
	sat	un sat	sat/ unsat	mean	sd
IP	65.2	34.78	1.87464	1.70963	0.152547
IP	62.7	37.31	1.68051
IP	61.14	38.85	1.57375
PV	68.41	31.59	2.16556	2.45931	0.347171
PV	70.34	29.68	2.36995
PV	73.96	26.02	2.84243
			T value	-3.42419
			P value	0.0266773
			Degrees of Freedom	4
