# Supplementary material for: Extra high superoxide dismutase in host tissue is associated with improving bleaching resistance in “thermal adapted” and Durusdinium trenchii-associating coral
Source: PeerJ. 2022 Jan 12;10:e12746. doi: 10.7717/peerj.12746 (PMC8760857; doi:10.7717/peerj.12746)
Supplement: Supplemental Information 15 [file peerj-10-12746-s015.xlsx]

## Sheet: PAM value
heating hour	colony replication	Platygyra		heating hour	colony replication	Isopora		heating hour	colony replication	Stylophora
0h	A	0.646		0h	A	0.711		0h	A	0.651667
0h	B	0.658667		0h	B	0.683		0h	B	0.668333
0h	C	0.707667		0h	C	0.669667		0h	C	0.634
8h	A	0.614467		8h	A	0.622067		1h	A	0.571
8h	B	0.6284		8h	B	0.6364		1h	B	0.547667
8h	C	0.624333		8h	C	0.619667		1h	C	0.581667
24h	A	0.63875		12h	A	0.579333		4h	A	0.495667
24h	B	0.609		12h	B	0.582333		4h	B	0.490333
24h	C	0.611417		12h	C	0.579667		4h	C	0.444333
32h	A	0.613778		17h	A	0.530333		10h	A	0.38725
32h	B	0.604		17h	B	0.482		10h	B	0.376611
32h	C	0.617889		17h	C	0.530333		10h	C	0.362389
48h	A	0.611444		24h	A	0.638		24h	A	0.134
48h	B	0.621556		24h	B	0.5455		24h	B	0.185
48h	C	0.642889		24h	C	0.500333		24h	C	0.198
56h	A	0.617833		32h	A	0.596556
56h	B	0.622		32h	B	0.556333
56h	C	0.6225		32h	C	0.521222
72h	A	0.640333		48h	A	0.244333
72h	B	0.652333		48h	B	0.416444
72h	C	0.645333		48h	C	0.371

## Sheet: algal density
heating hour	colony replication	Platygyra (*10^6cm^2)		heating hour	colony replication	Isopora (*10^6cm^2)		heating hour	colony replication	Stylophora (*10^6cm^2)
0h	A	2.66449		0h	A	1.91232		0h	A	0.897009
0h	B	3.07126		0h	B	1.26862		0h	B	0.823735
0h	C	3.43543		0h	C	1.75251		0h	C	0.851492
8h	A	3.46055		8h	A	1.12076		4h	A	0.786469
8h	B	1.94242		8h	B	1.1331		4h	B	1.26393
8h	C	2.60774		8h	C	1.71792		4h	C	0.866158
24h	A	2.69257		24h	A	0.21224		8h	A	0.560954
24h	B	3.81333		24h	B	0.274406		8h	B	0.382474
24h	C	3.37819		24h	C	0.0997215		8h	C	0.572611
48h	A	3.28157		48h	A	0.594478		10h	A	0.280503
48h	B	4.73617		48h	B	0.373227		10h	B	0.602518
48h	C	2.66747		48h	C	0.258027		10h	C	0.195067
72h	A	2.35594						12h	A	0.331041
72h	B	2.54817						12h	B	0.39509
72h	C	3.5248						12h	C	0.309257
								14h	A	0.13655
								14h	B	0.271242
								14h	C	0.3024
								24h	A	0.144981
								24h	B	0.110455
								24h	C	0.0848869
