# Supplementary material for: Extra high superoxide dismutase in host tissue is associated with improving bleaching resistance in “thermal adapted” and Durusdinium trenchii-associating coral
Source: PeerJ. 2022 Jan 12;10:e12746. doi: 10.7717/peerj.12746 (PMC8760857; doi:10.7717/peerj.12746)
Supplement: Supplemental Information 16 [file peerj-10-12746-s016.xlsx]

## Sheet: RBT and tissue thickness
RBT (°C)				tissue thickness (mm)
	Isopora	Platygyra			Isopora	Platygyra
	36.3	35.6			3.2	3.3
	36.4	34.8			3	2.8
	35.4	36			2.9	2.4
mean	36.0333	35.4667			3.03333	2.83333
sd	0.550757	0.61101			0.152753	0.450925
