# Supplementary material for: Extra high superoxide dismutase in host tissue is associated with improving bleaching resistance in “thermal adapted” and Durusdinium trenchii-associating coral
Source: PeerJ. 2022 Jan 12;10:e12746. doi: 10.7717/peerj.12746 (PMC8760857; doi:10.7717/peerj.12746)
Supplement: Supplemental Information 17 [file peerj-10-12746-s017.xlsx]

## Sheet: worksheet 
	SOD (Umg^-1)					CAT (mmol min^-1 mg^-1)
	heating hour	Platygyra verweyi	heating hour	Isopora palifera		heating hour	Platygyra verweyi	heating hour	Isopora palifera
	0	97.25	0	7.43		0	1072.71	0	471.07
	0	107.49	0	7.25		0	1718.96	0	605.3
	0	85.74	0	6.14		0	1817.37	0	692.52
	24	99.41	8	8.56		24	1488.75	8	518.22
	24	144.53	8	9.97		24	1658.48	8	624.47
	24	63.61	8	9.21		24	1736.33	8	611.17
	48	73.44	18	5.18		48	1255.18	18	520.83
	48	111.23	18	14.36		48	2196.21	18	979.03
	48	109.05	18	7.35		48	2362.76	18	636.49
	72	239.8	24	16.23		72	2241.3	24	673.41
	72	147.89	24	14.74		72	1324.5	24	898.5
	72	155.09	24	12.56		72	2296.56	24	977.38
